# Supplementary material
Source: MDPI journal article supplement (https://www.mdpi.com/2073-4344/13/3/603)
Supplement: s1 [file s1]

# Synthesis of *N*-Substituted Pyrroles Catalyzed by Low-cost and Commercially Available Aluminas

Omar Portilla-Zúñiga <sup>1</sup>, Óscar M. Bautista-Aguilera <sup>2</sup>, José J. Martínez <sup>3</sup>, Hugo Rojas <sup>3</sup>, Mario A. Macías <sup>4</sup>, Isabel Iriepea <sup>2,5</sup>, Adrián Pérez-Redondo <sup>2,5</sup>, Ángel Sathicq <sup>1,\*</sup>, Juan-Carlos Castillo <sup>3,\*</sup>, and Gustavo P. Romanelli <sup>1,6</sup>

<sup>1</sup> Centro de Investigación y Desarrollo en Ciencias Aplicadas “Dr. Jorge J. Ronco” (CINDECA-CCT La Plata-CONICET-CIC-PBA), Universidad Nacional de La Plata, Calle 47 No 257, B1900AJK La Plata, Argentina; ommipz@gmail.com (O.P.-Z.); agsathicq@quimica.unlp.edu.ar (Á.S.)

<sup>2</sup> Departamento de Química Orgánica y Química Inorgánica, Universidad de Alcalá, Km. 33, 6, 28871 Madrid, Spain; oscar.bautista@uah.es (Ó.M.B.-A.); isabel.iriepa@uah.es (I.I.); adrian.perez@uah.es (A.P.-R)

<sup>3</sup> Escuela de Ciencias Química, Universidad Pedagógica y Tecnológica de Colombia, Avenida Central del Norte 39-115, Tunja, Colombia; jose.martinez@uptc.edu.co (J.J.M.); hugo.rojas@uptc.edu.co (H.R.); juan.castillo06@uptc.edu.co (J.-C.C.)

<sup>4</sup> Crystallography and Chemistry of Materials, Department of Chemistry, Universidad de los Andes, Carrera 1 No. 18A-10, Bogotá 111711, Colombia; ma.maciasl@uniandes.edu.co (M.A.M)

<sup>5</sup> Institute of Chemical Research Andrés M. del Río, 28805-Alcalá de Henares, Madrid, Spain.

<sup>6</sup> Centro de Investigación en Sanidad Vegetal (CISaV) / Cátedra de Química Orgánica, Facultad de Ciencias Agrarias y Forestales, Universidad Nacional de La Plata, Calles 60 y 119 s/n, B1904AAN La Plata, Argentina; gpr@quimica.unlp.edu.ar (G.P.R.)

\* Correspondence: agsathicq@quimica.unlp.edu.ar (Á.S.); juan.castillo06@uptc.edu.co (J.-C.C.)

## SUPPORTING INFORMATION

### Content:

|    |                                                                                              |        |
|----|----------------------------------------------------------------------------------------------|--------|
| 1. | Copies of NMR spectra for compounds <b>3</b> .....                                           | p. S2  |
| 2. | Copies of HRMS spectra for compounds <b>3</b> .....                                          | p. S19 |
| 3. | Crystal data, data collection, and structure refinement details for compound <b>3g</b> ..... | p. S26 |
| 4. | X-Ray powder diffraction data for compound <b>3g</b> .....                                   | p. S27 |
| 5. | Surface area, pore volume, and pore size of aluminas.....                                    | p. S28 |
| 6. | References.....                                                                              | p. S36 |

## 1. Copies of NMR spectra for compounds 3

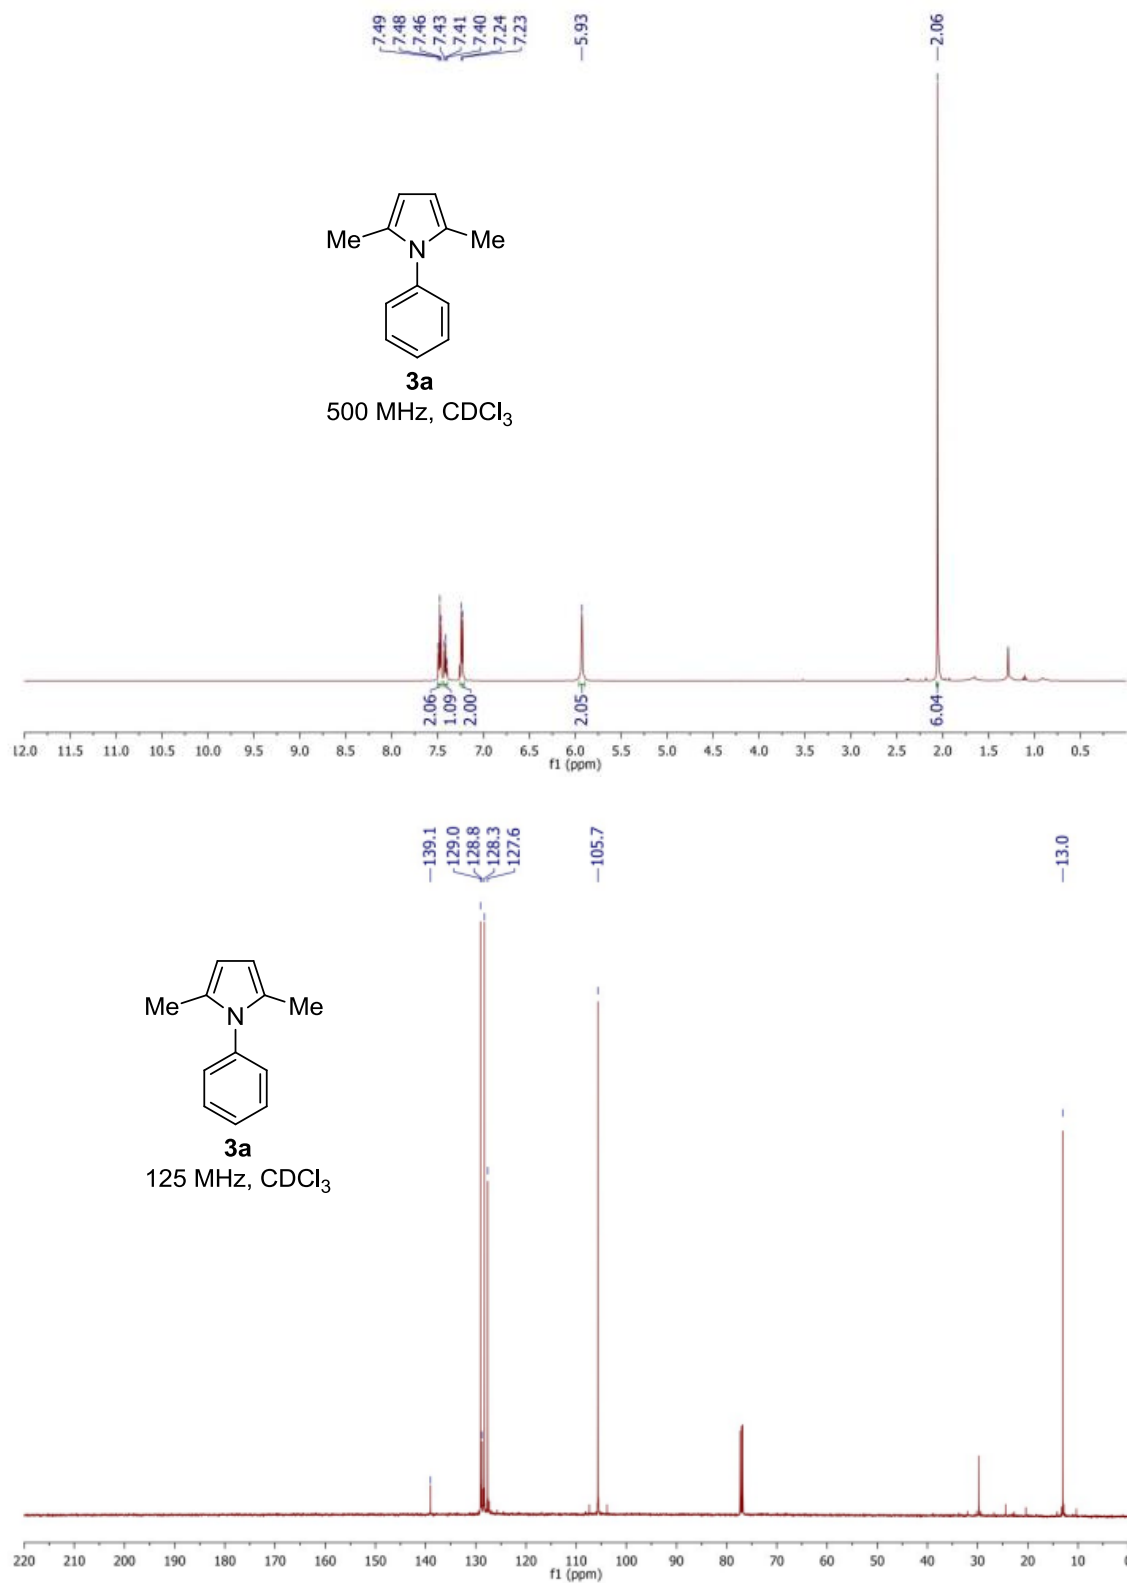

**Figure S1:** <sup>1</sup>H and <sup>13</sup>C{<sup>1</sup>H} spectra for 2,5-dimethyl-1-phenyl-1H-pyrrole **3a**. [1]

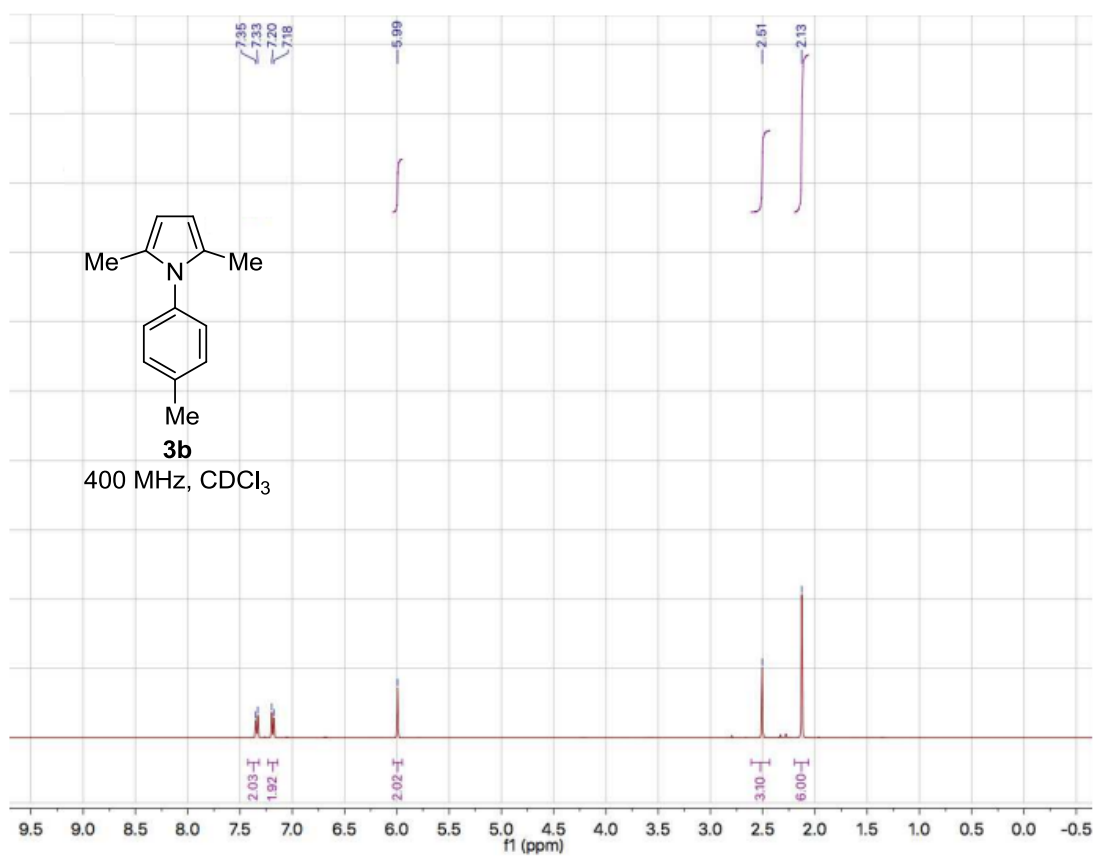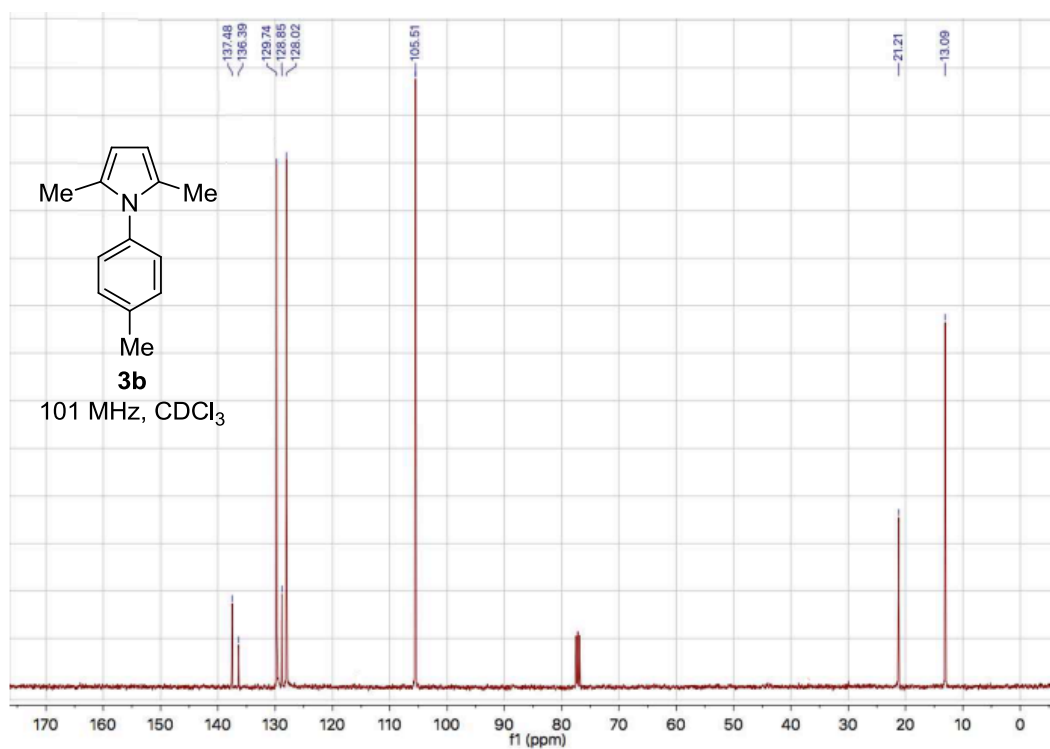

**Figure S2:** <sup>1</sup>H and <sup>13</sup>C{<sup>1</sup>H} spectra for 2,5-dimethyl-1-(p-tolyl)-1H-pyrrole **3b**. [2]

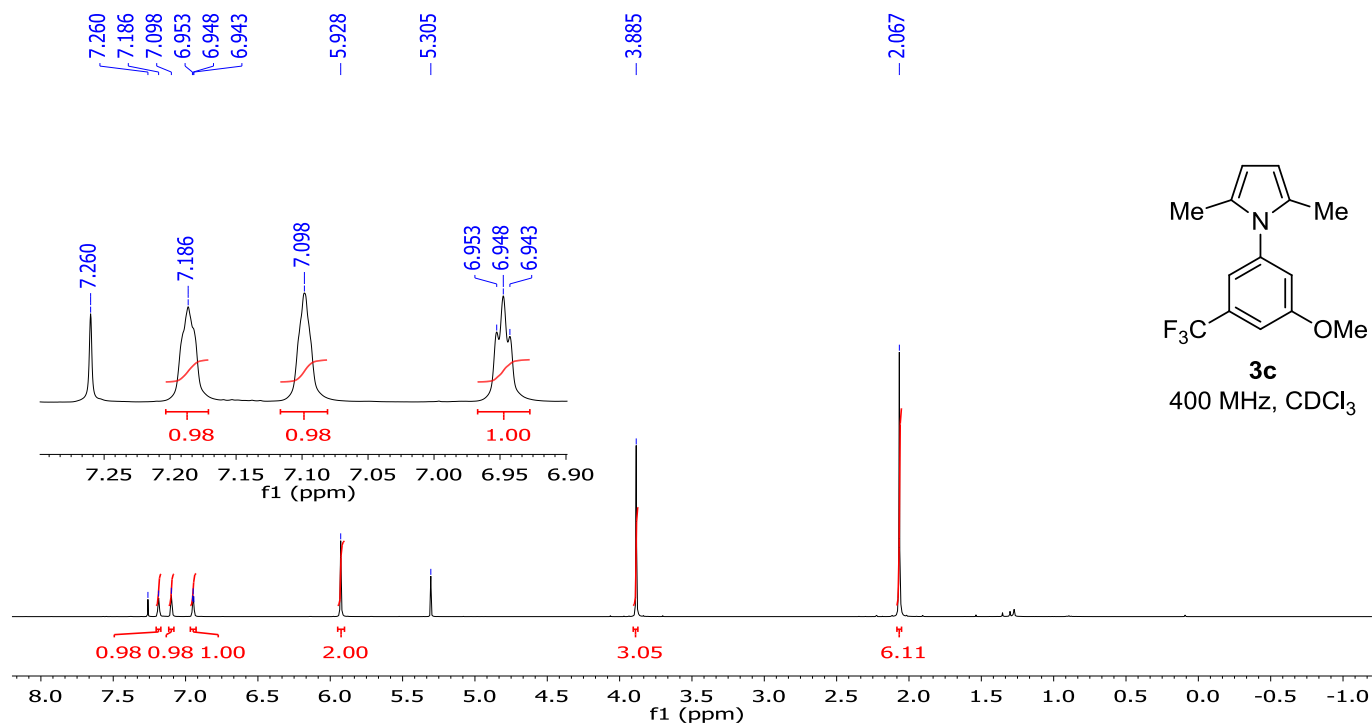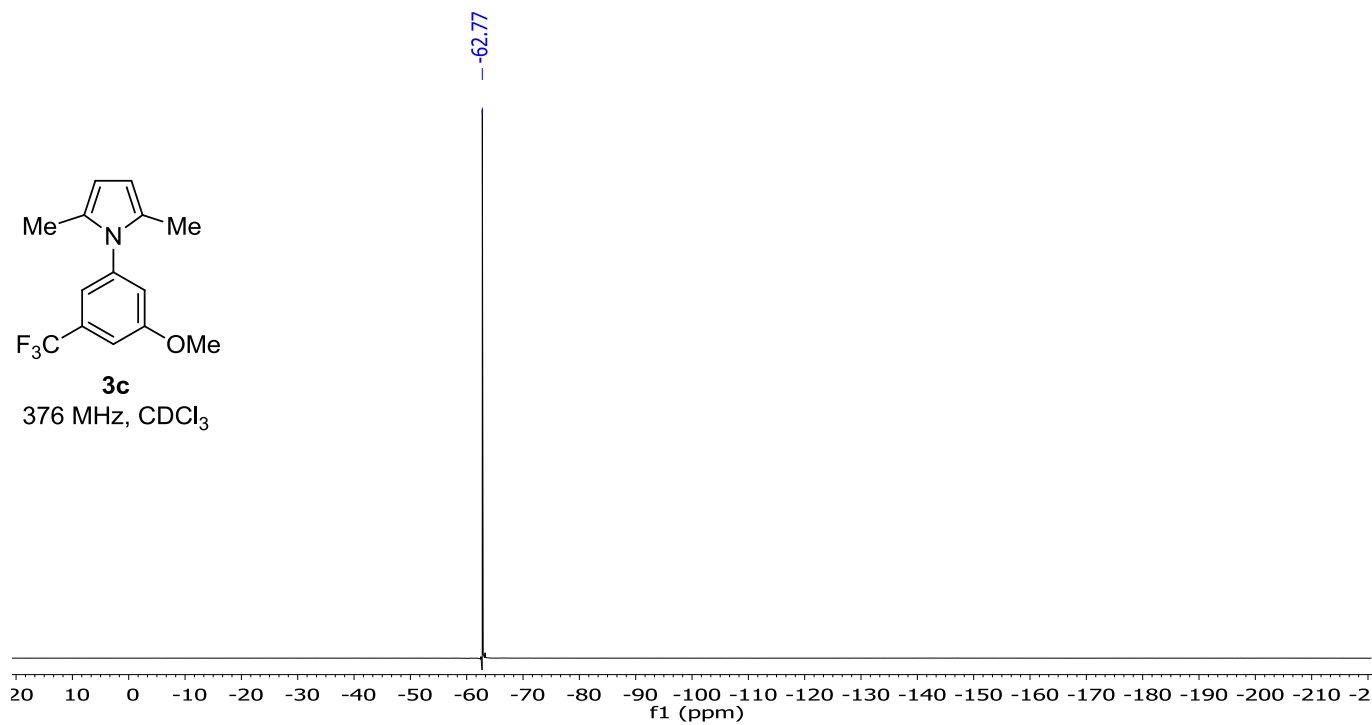

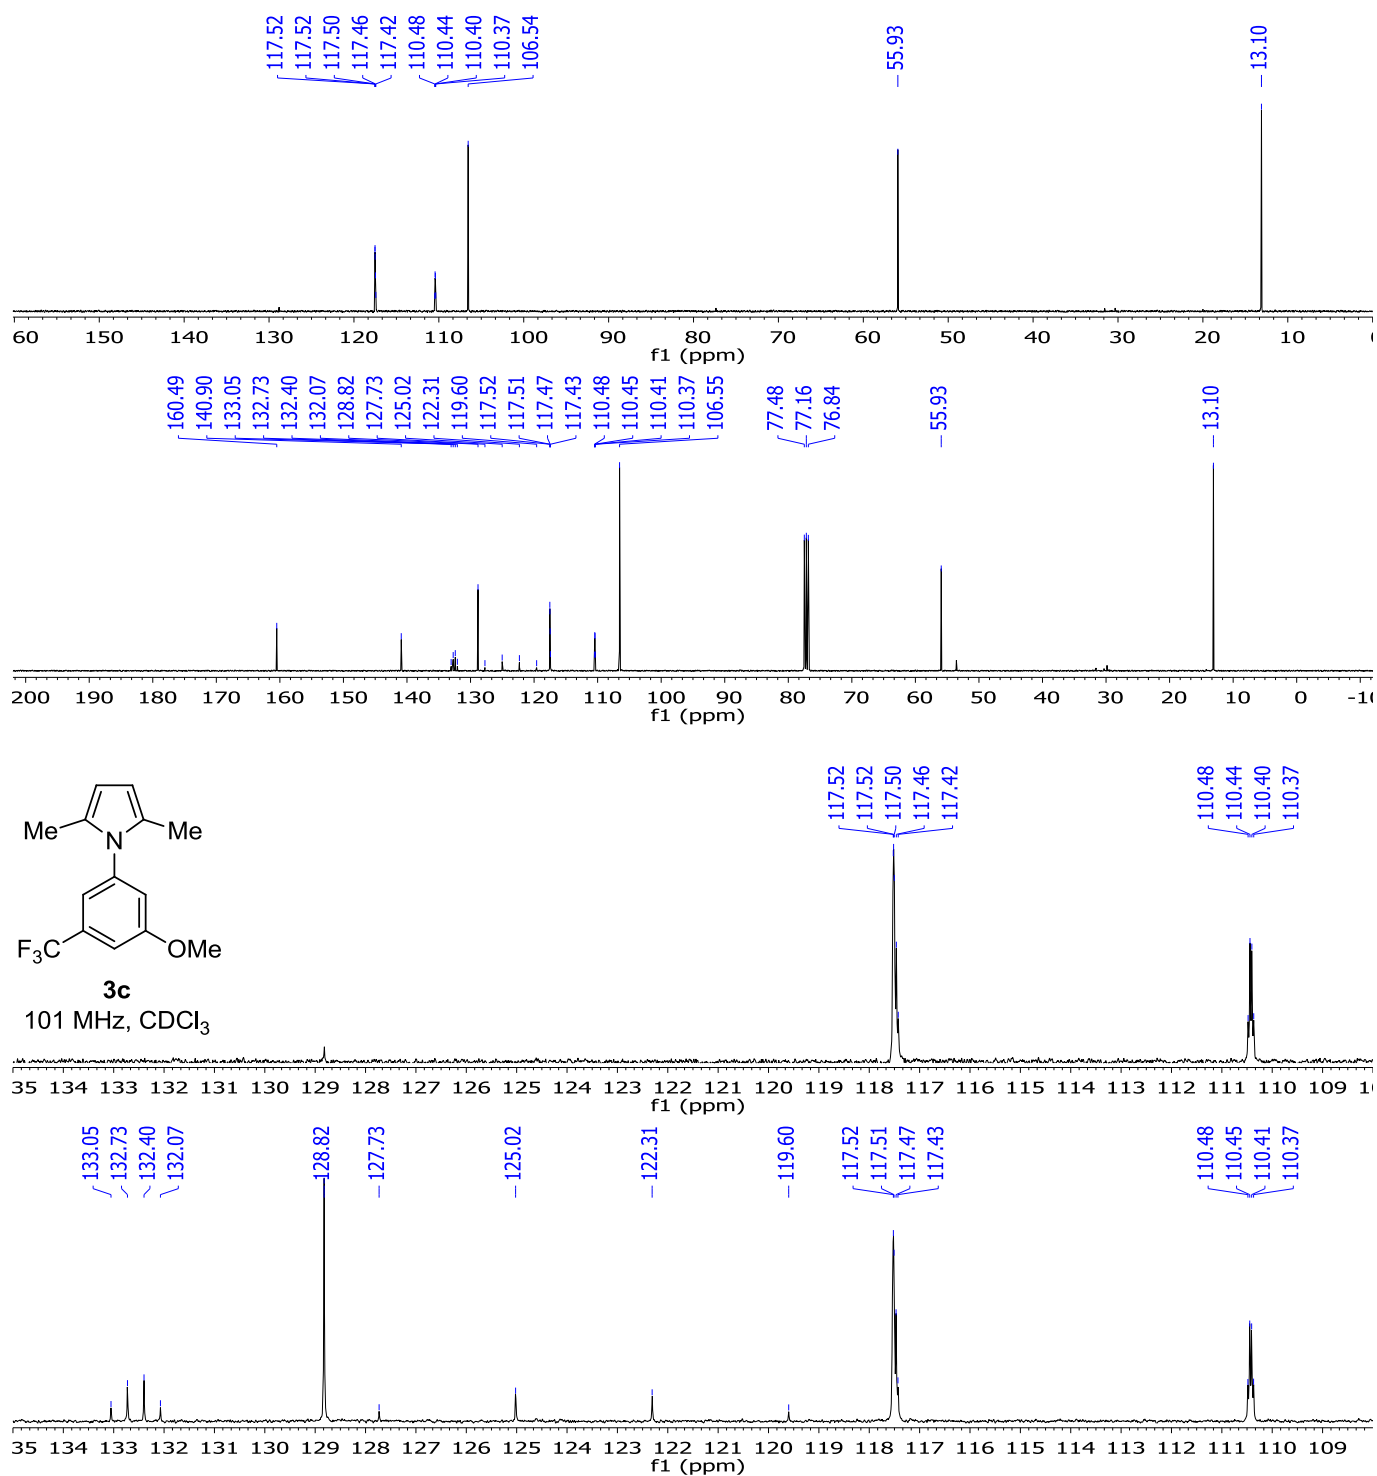

**Figure S3:** <sup>1</sup>H, <sup>19</sup>F{<sup>1</sup>H}, <sup>13</sup>C{<sup>1</sup>H}, and DEPT-135 spectra for 1-(3-methoxy-5-(trifluoromethyl)phenyl)-2,5-dimethyl-1H-pyrrole **3c**

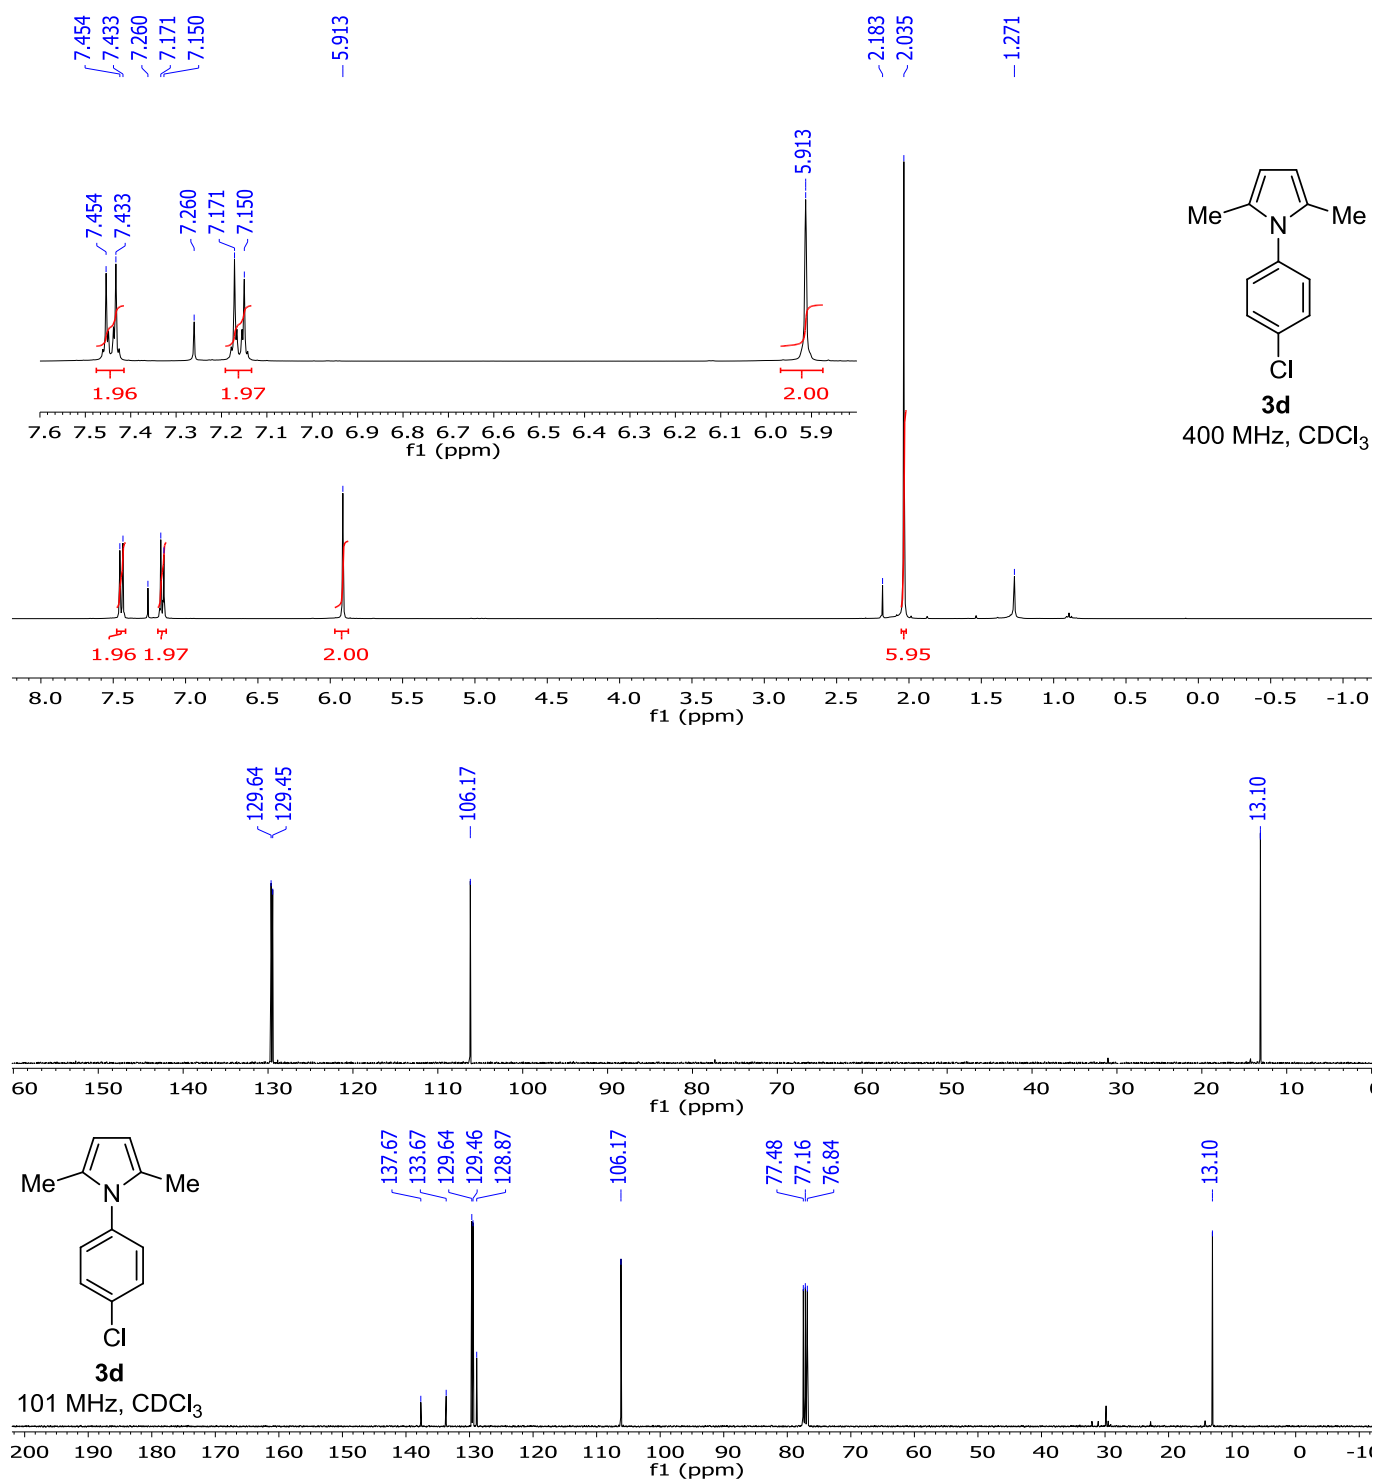

**Figure S4:** <sup>1</sup>H, <sup>13</sup>C{<sup>1</sup>H}, and DEPT-135 spectra for 1-(4-chlorophenyl)-2,5-dimethyl-1*H*-pyrrole **3d**. [3]

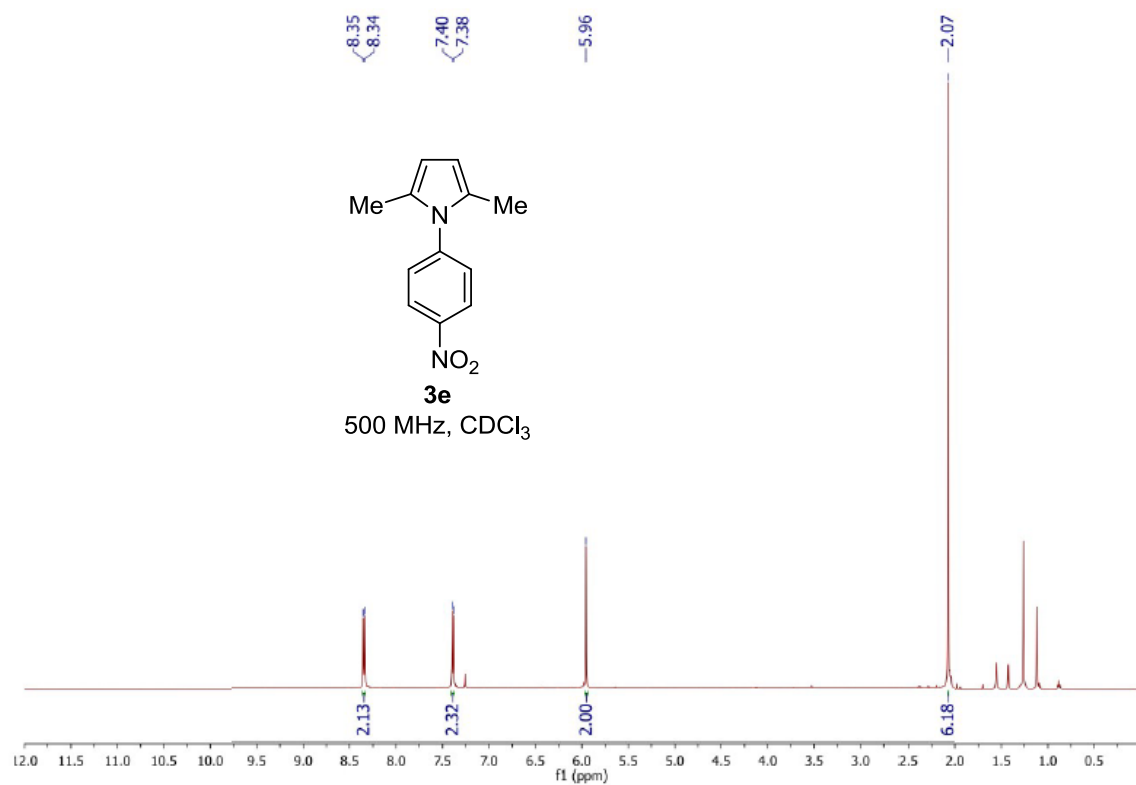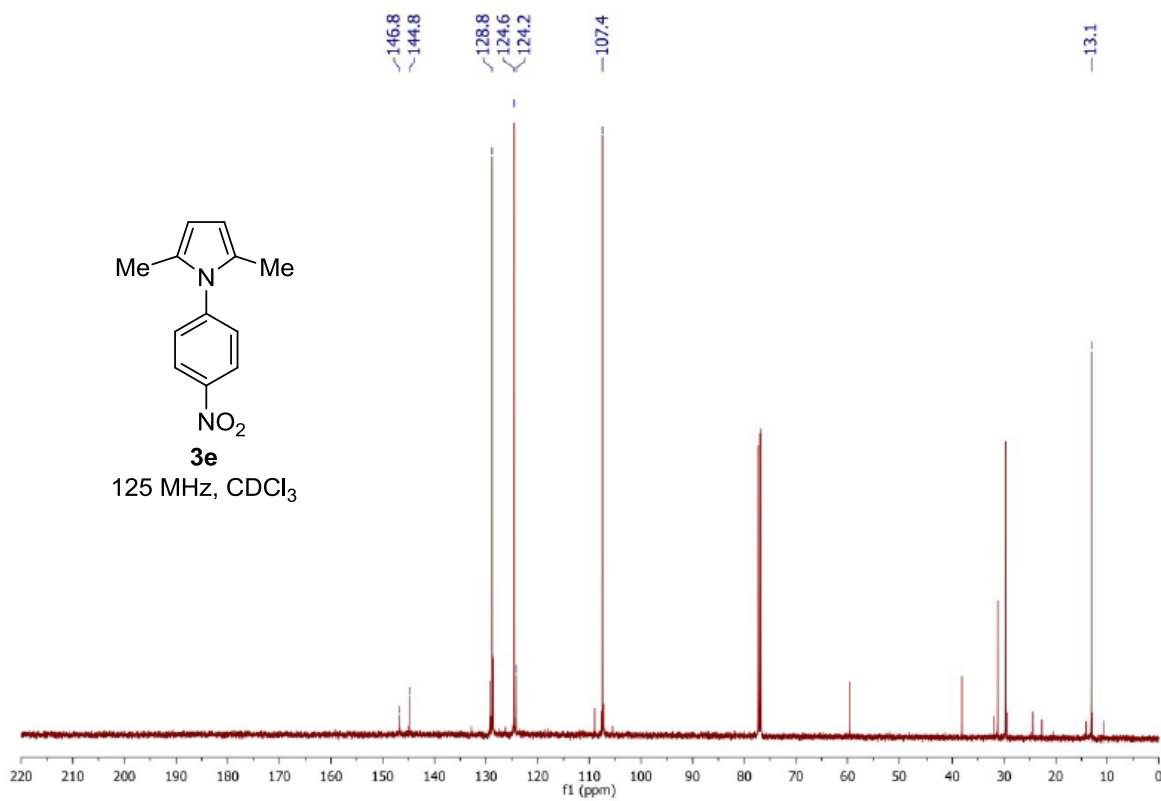

**Figure S5:**  $^1\text{H}$  and  $^{13}\text{C}\{^1\text{H}\}$  spectra for 2,5-dimethyl-1-(4-nitrophenyl)-1H-pyrrole **3e**. [1]

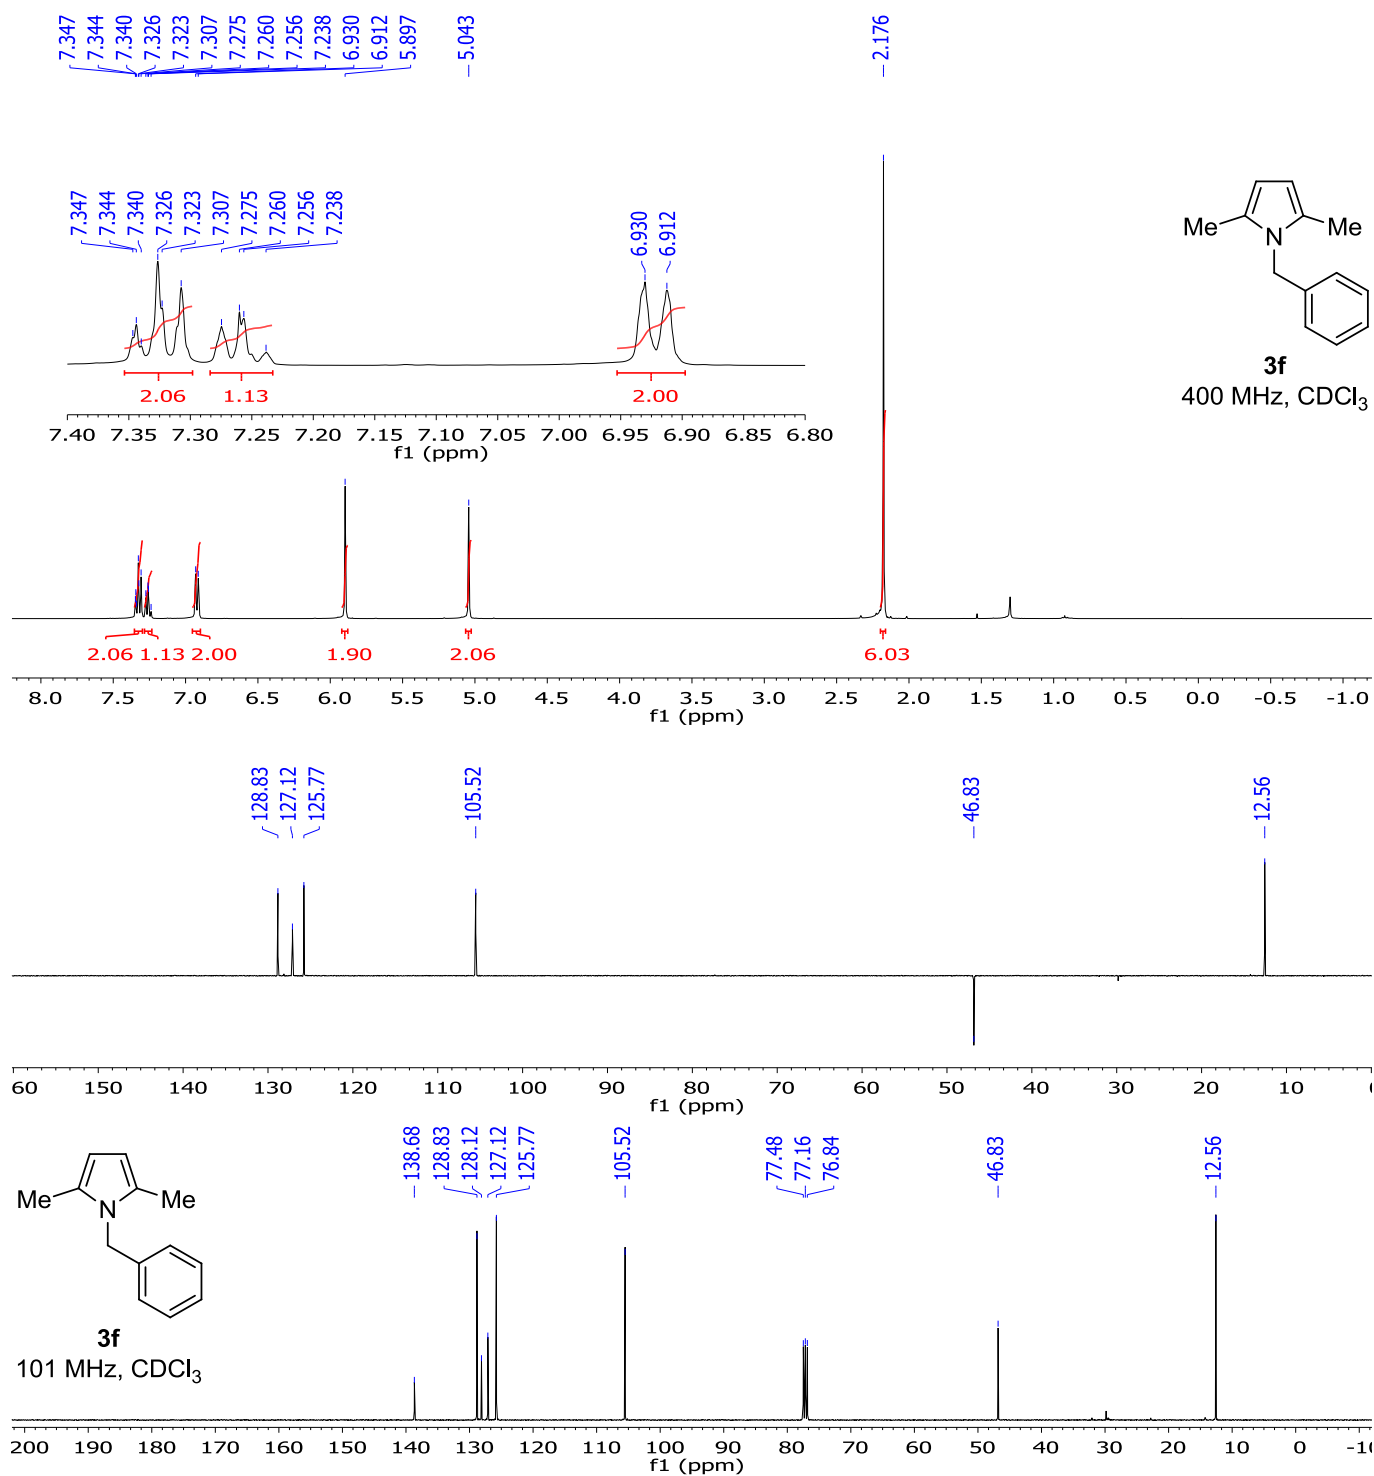

**Figure S6:** <sup>1</sup>H, <sup>13</sup>C{<sup>1</sup>H}, and DEPT-135 spectra for 1-benzyl-2,5-dimethyl-1H-pyrrole **3f**. [3]



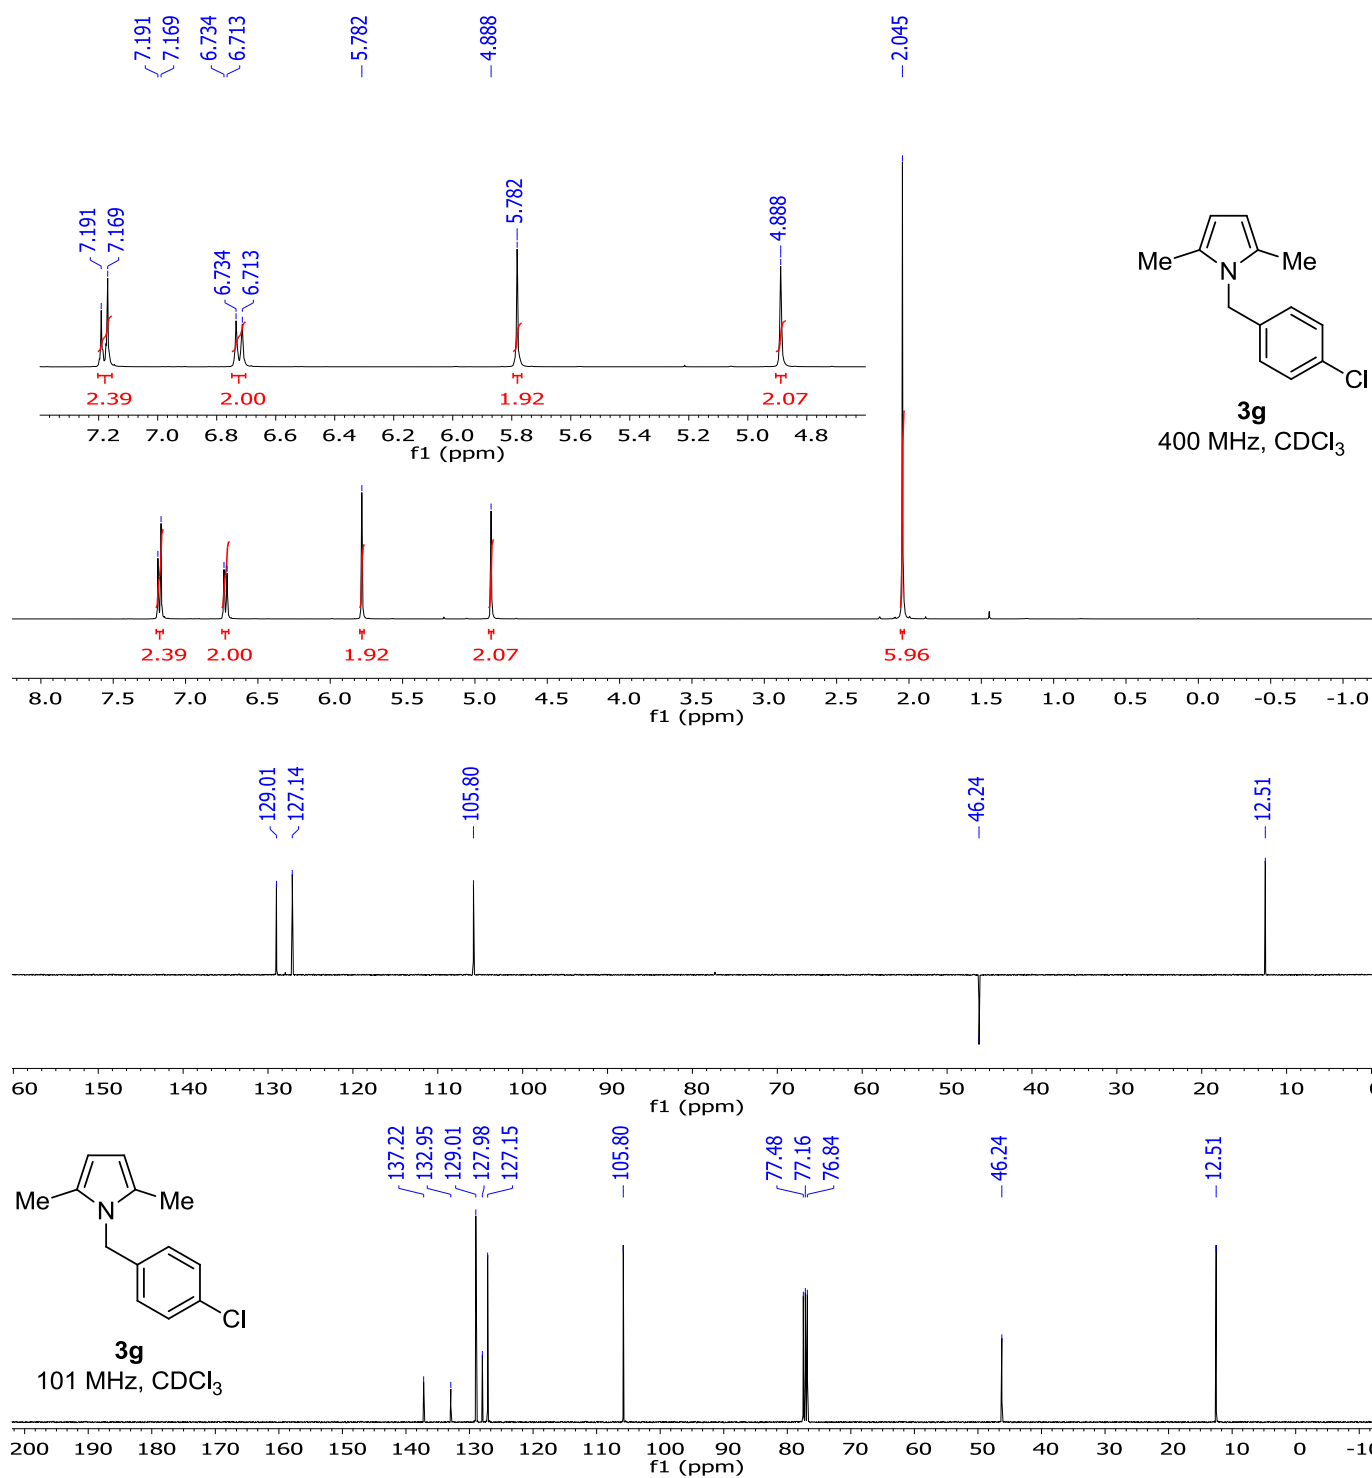

**Figure S7:** <sup>1</sup>H, <sup>13</sup>C{<sup>1</sup>H}, and DEPT-135 spectra for 1-(4-chlorobenzyl)-2,5-dimethyl-1H-pyrrole **3g**. [4]

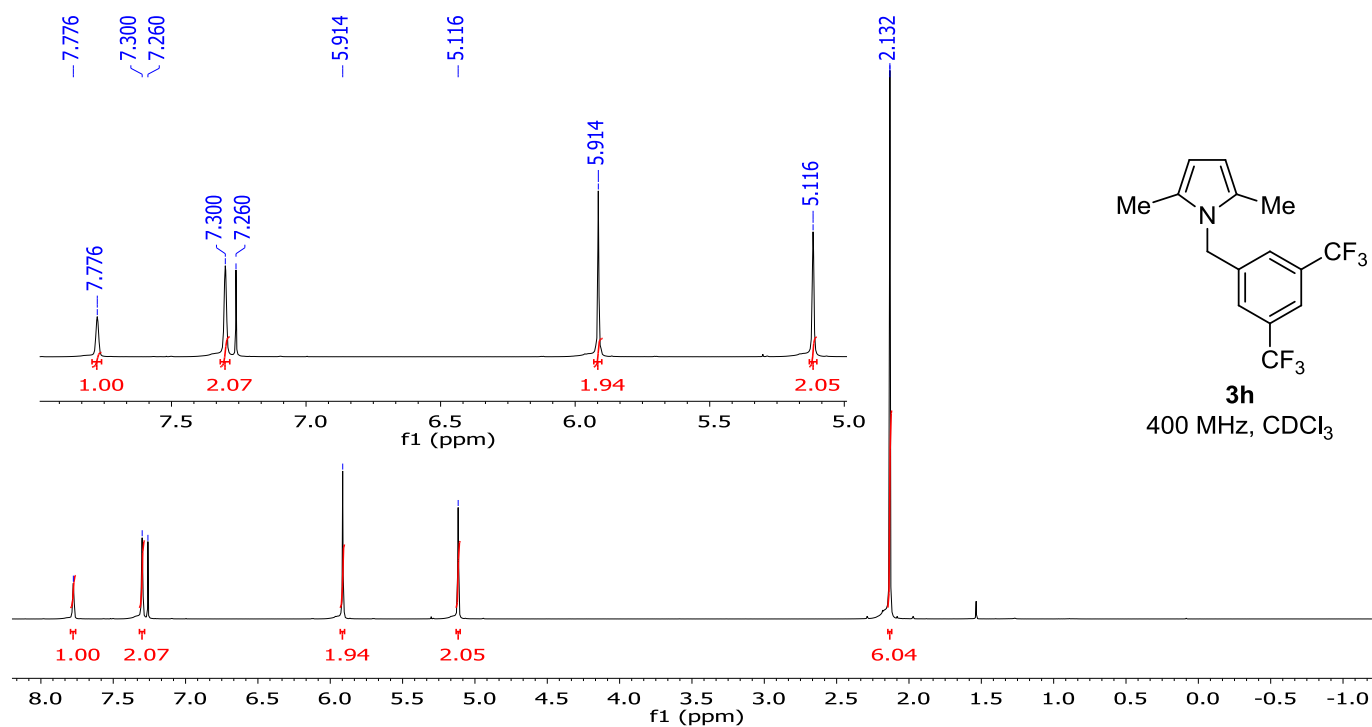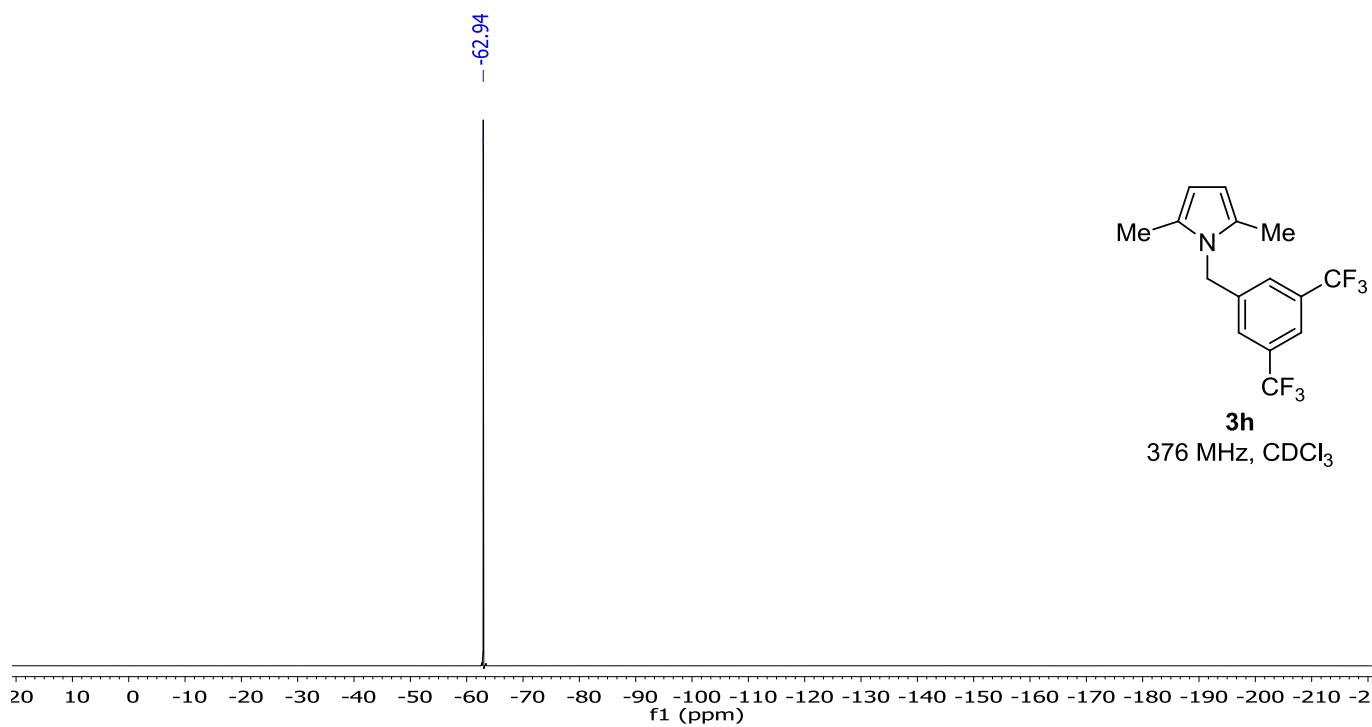

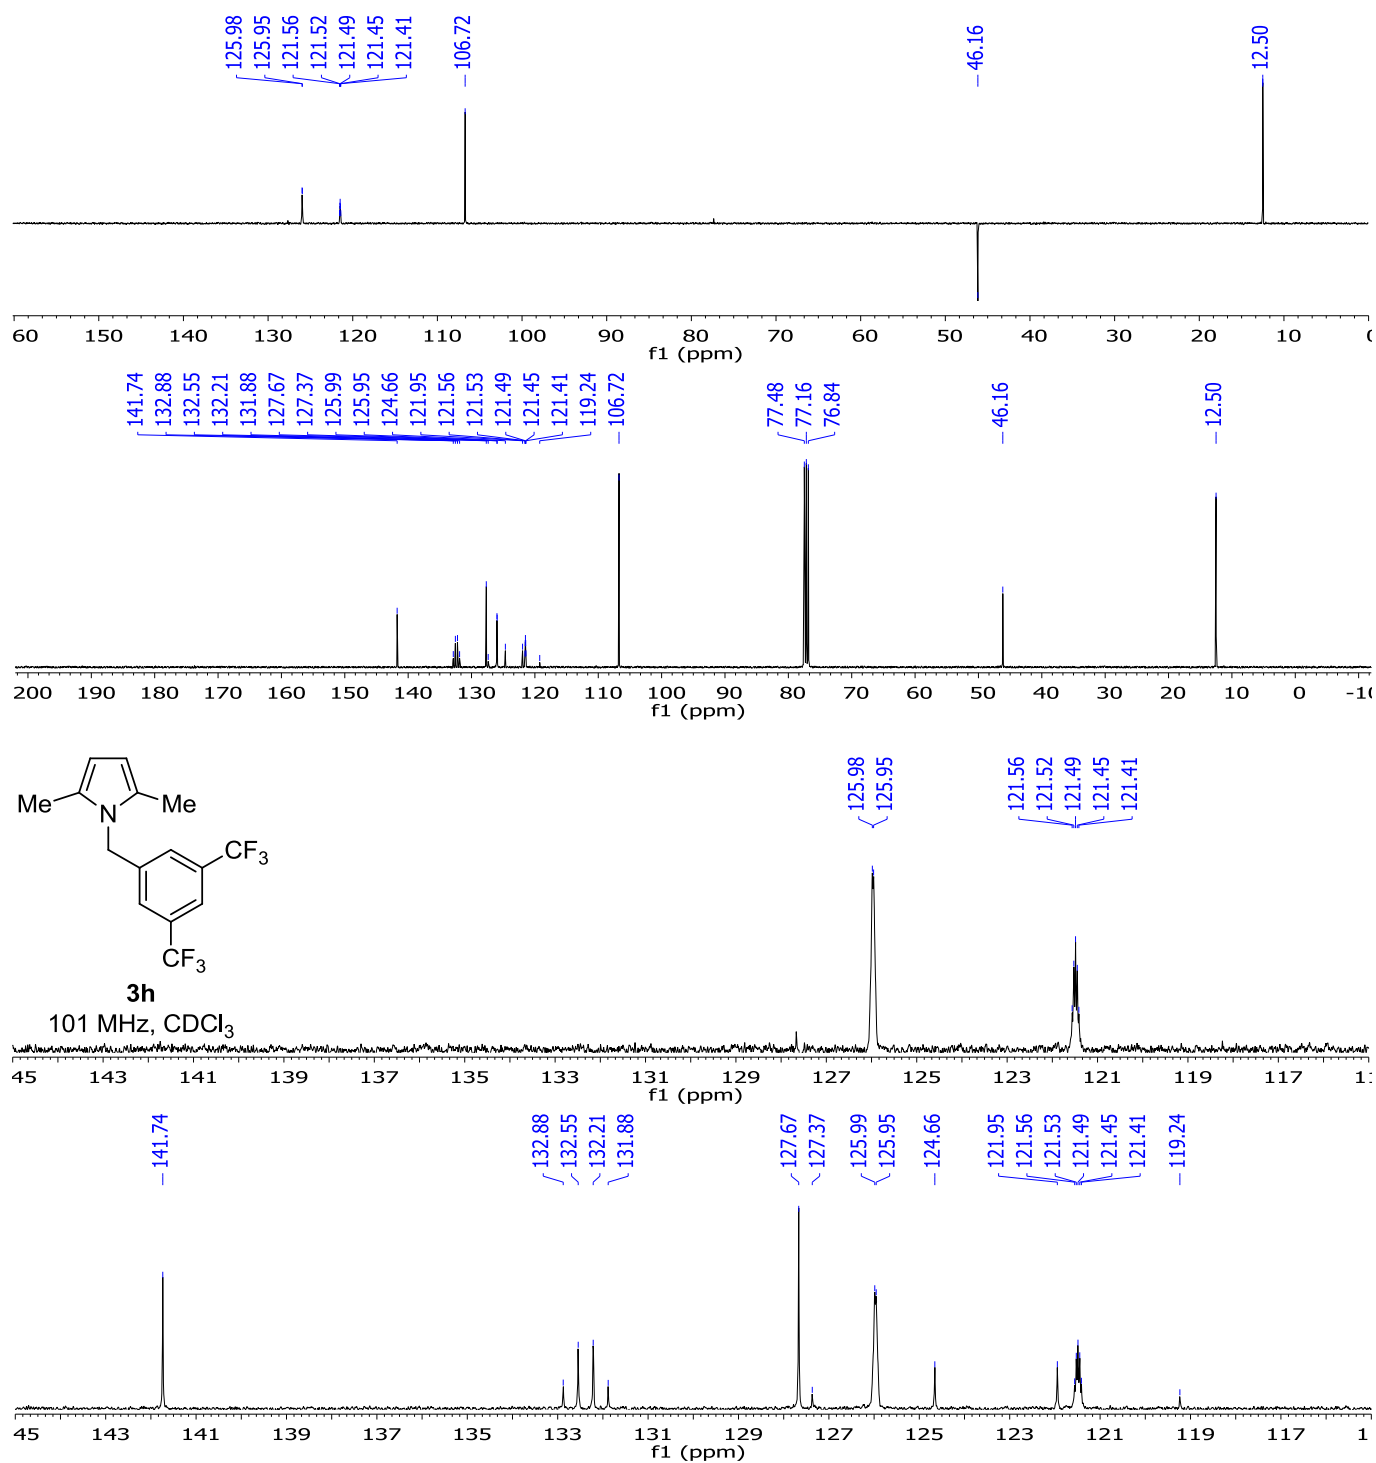

**Figure S8:** <sup>1</sup>H, <sup>19</sup>F{<sup>1</sup>H}, <sup>13</sup>C{<sup>1</sup>H}, and DEPT-135 spectra for 1-(3,5-bis(trifluoromethyl)benzyl)-2,5-dimethyl-1H-pyrrole **3h**.

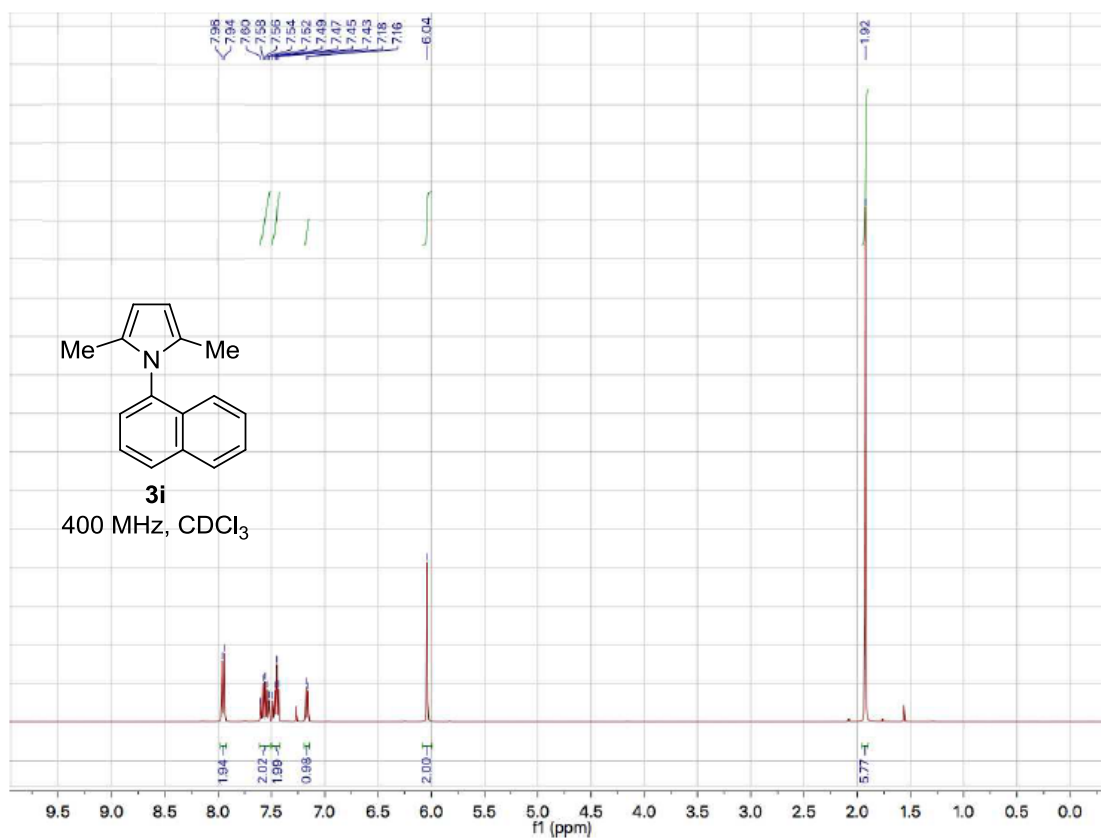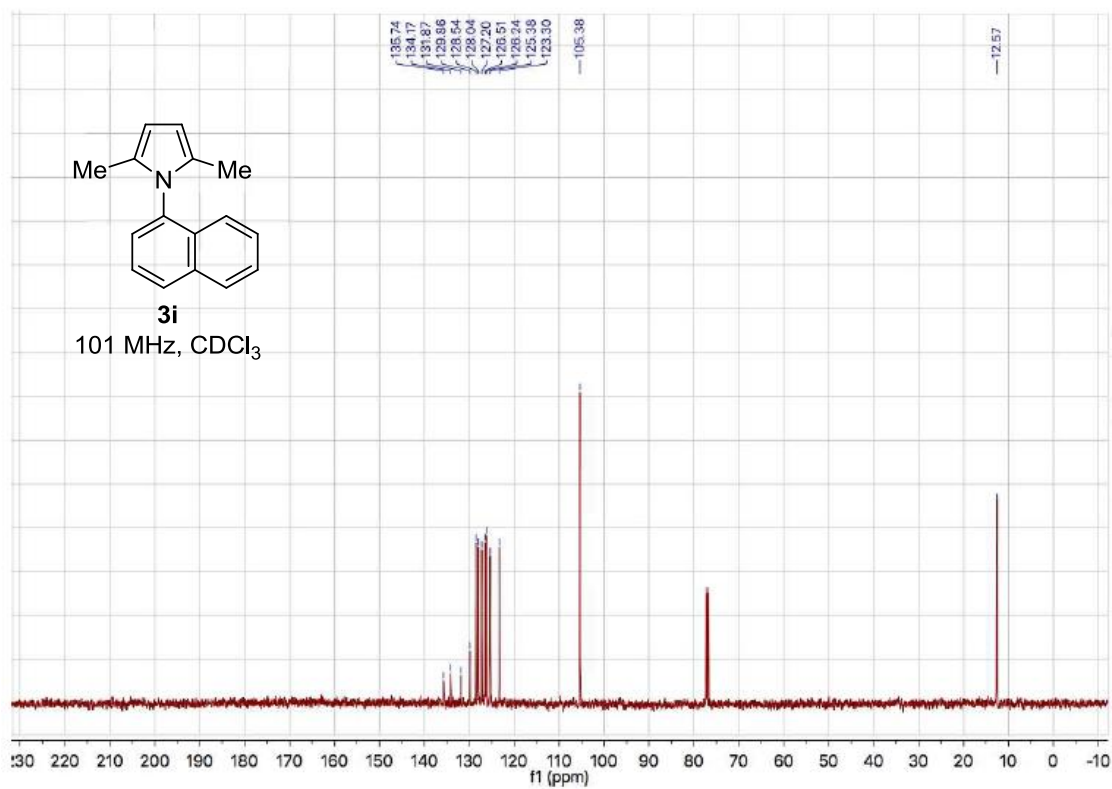

**Figure S9:** <sup>1</sup>H and <sup>13</sup>C{<sup>1</sup>H} spectra for 2,5-dimethyl-1-(naphthalen-1-yl)-1H-pyrrole **3i**. [3]

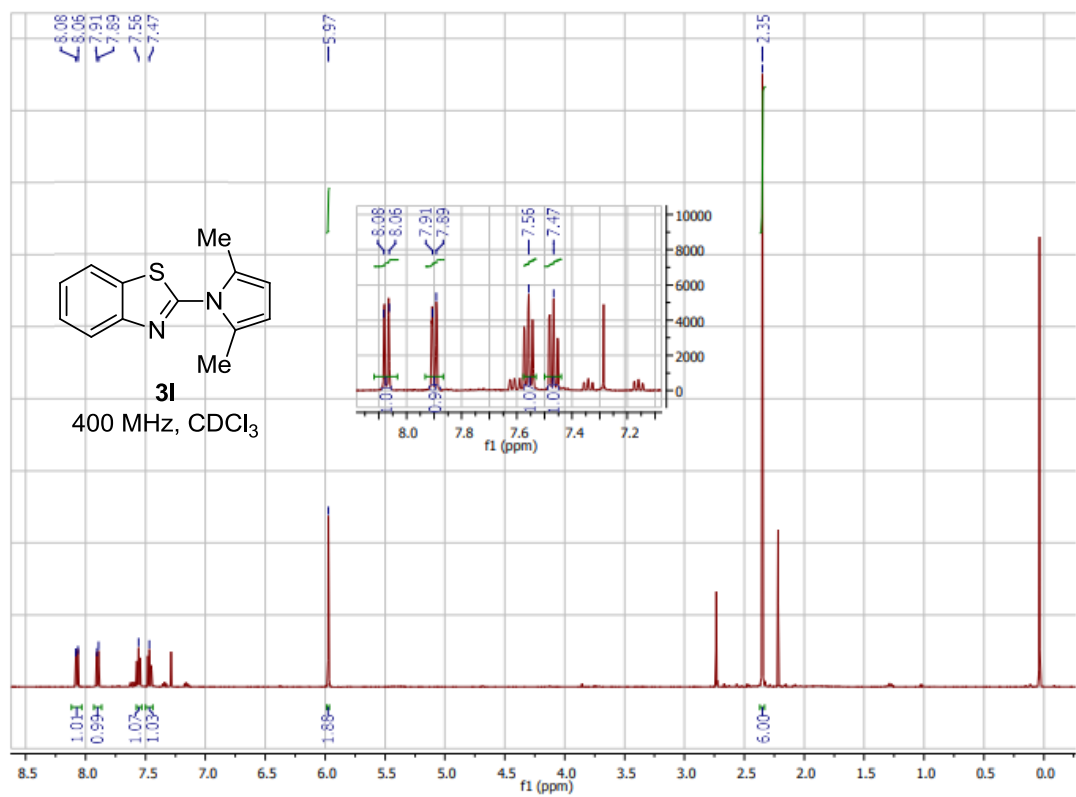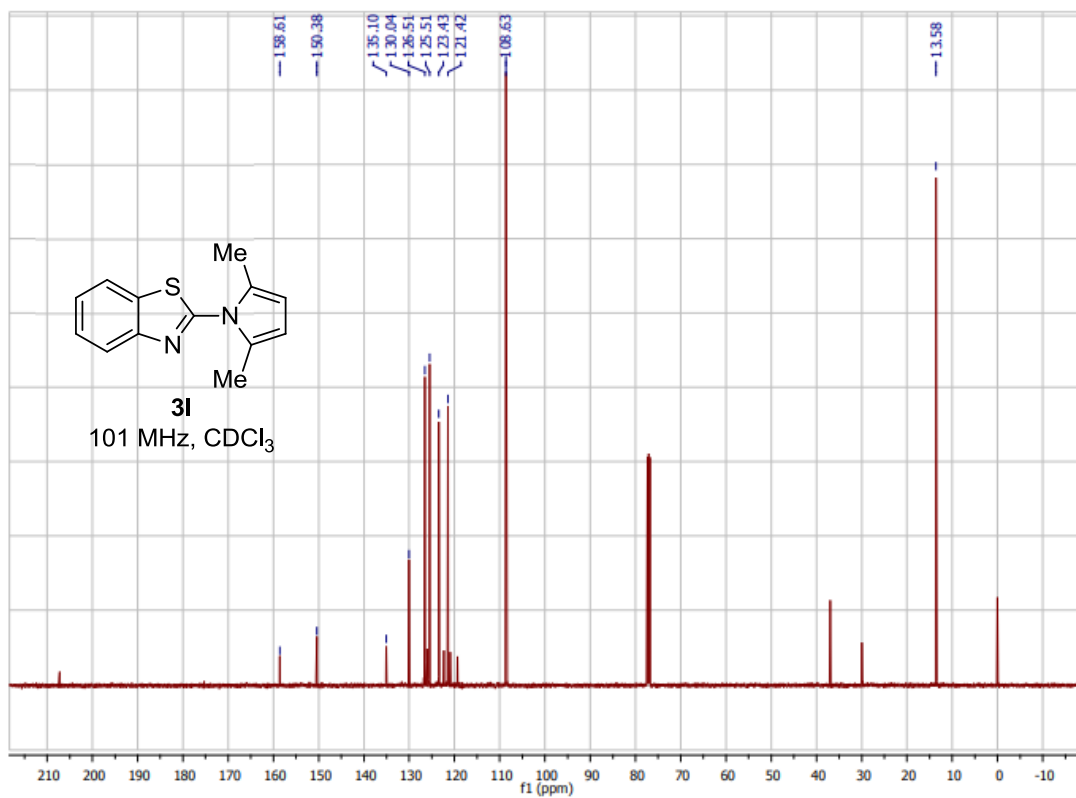

**Figure S10:**  $^1\text{H}$  and  $^{13}\text{C}\{^1\text{H}\}$  spectra for 2-(2,5-dimethyl-1H-pyrrol-1-yl)benzo[d]thiazole **3l**. [5]

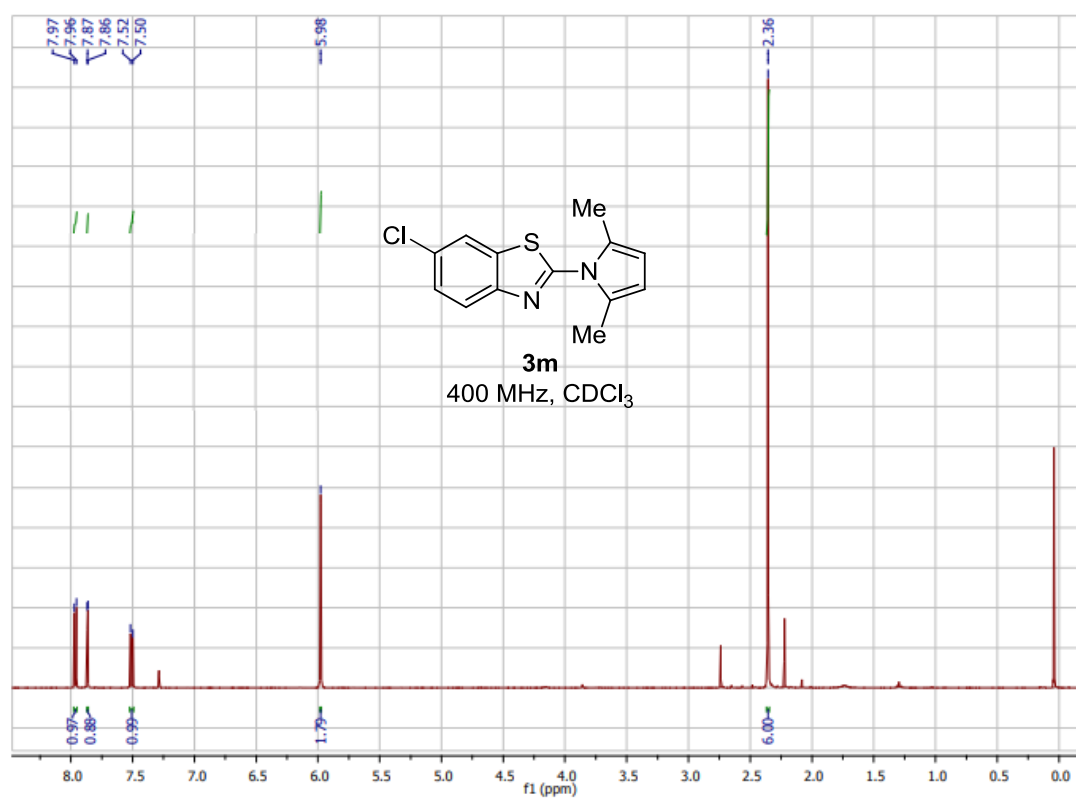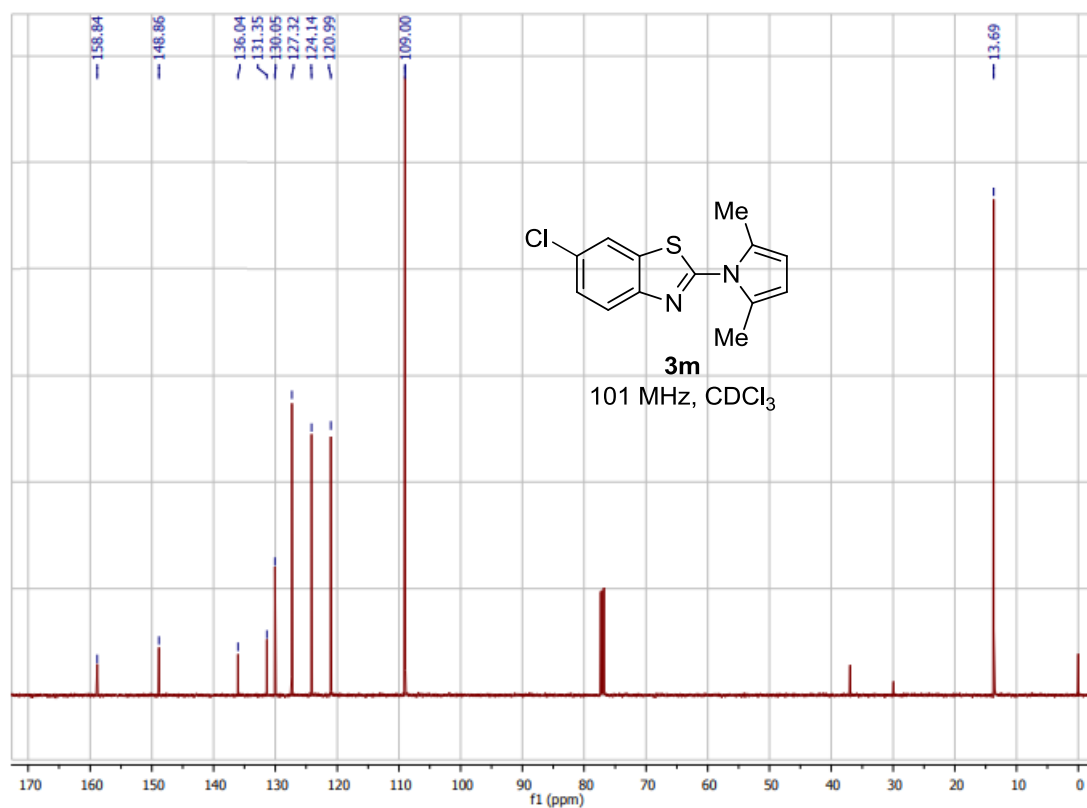

**Figure S11:** <sup>1</sup>H and <sup>13</sup>C{<sup>1</sup>H} spectra for 6-chloro-2-(2,5-dimethyl-1H-pyrrol-1-yl)benzo[d]thiazole **3m**. [5]

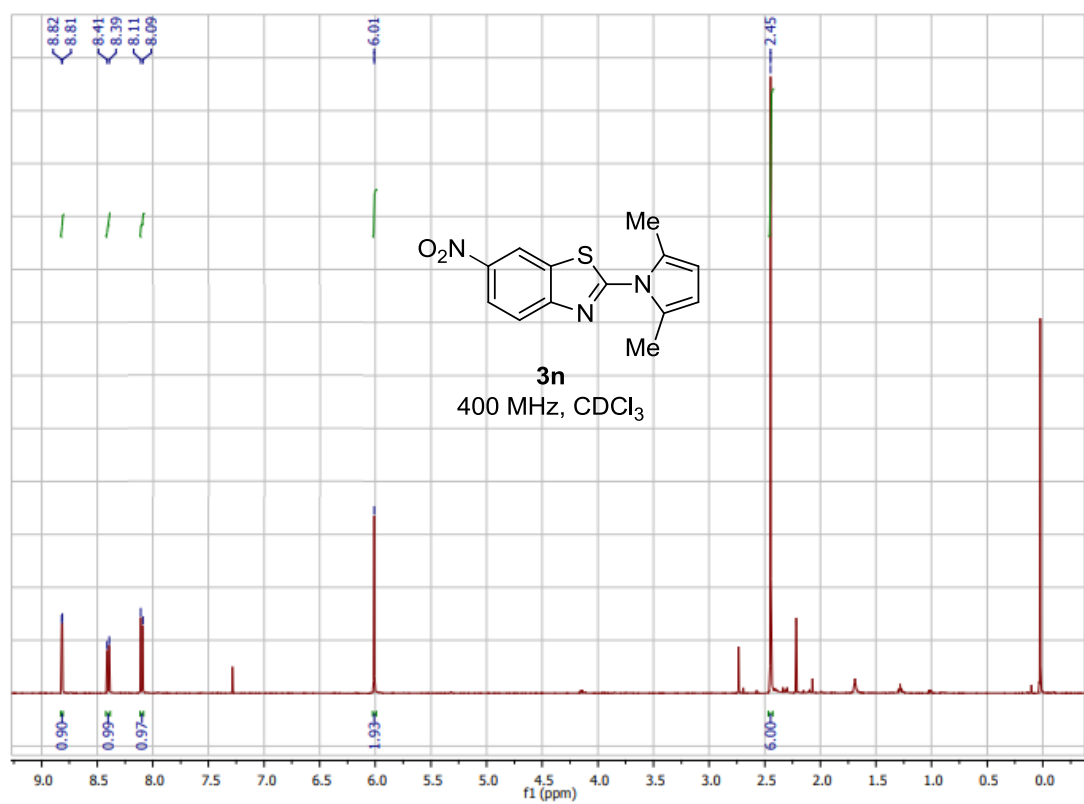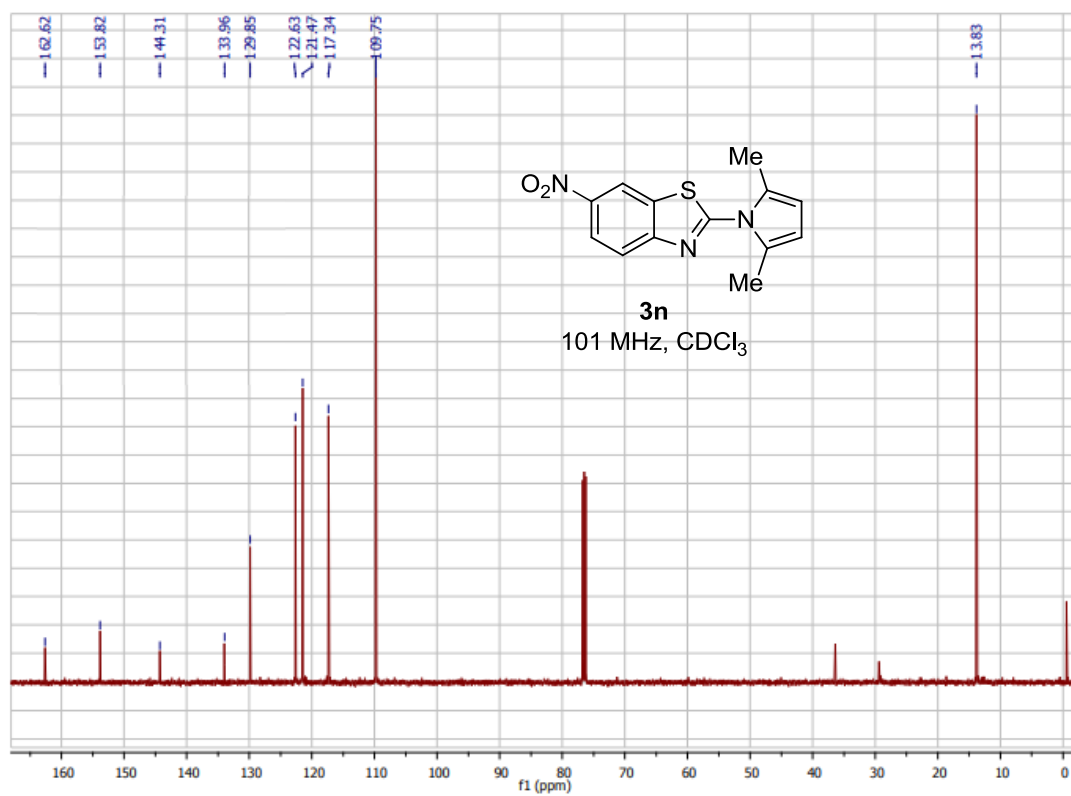

**Figure S12:** <sup>1</sup>H and <sup>13</sup>C{<sup>1</sup>H} spectra for 2-(2,5-dimethyl-1H-pyrrol-1-yl)-6-nitrobenzo[d]thiazole **3n**. [5]

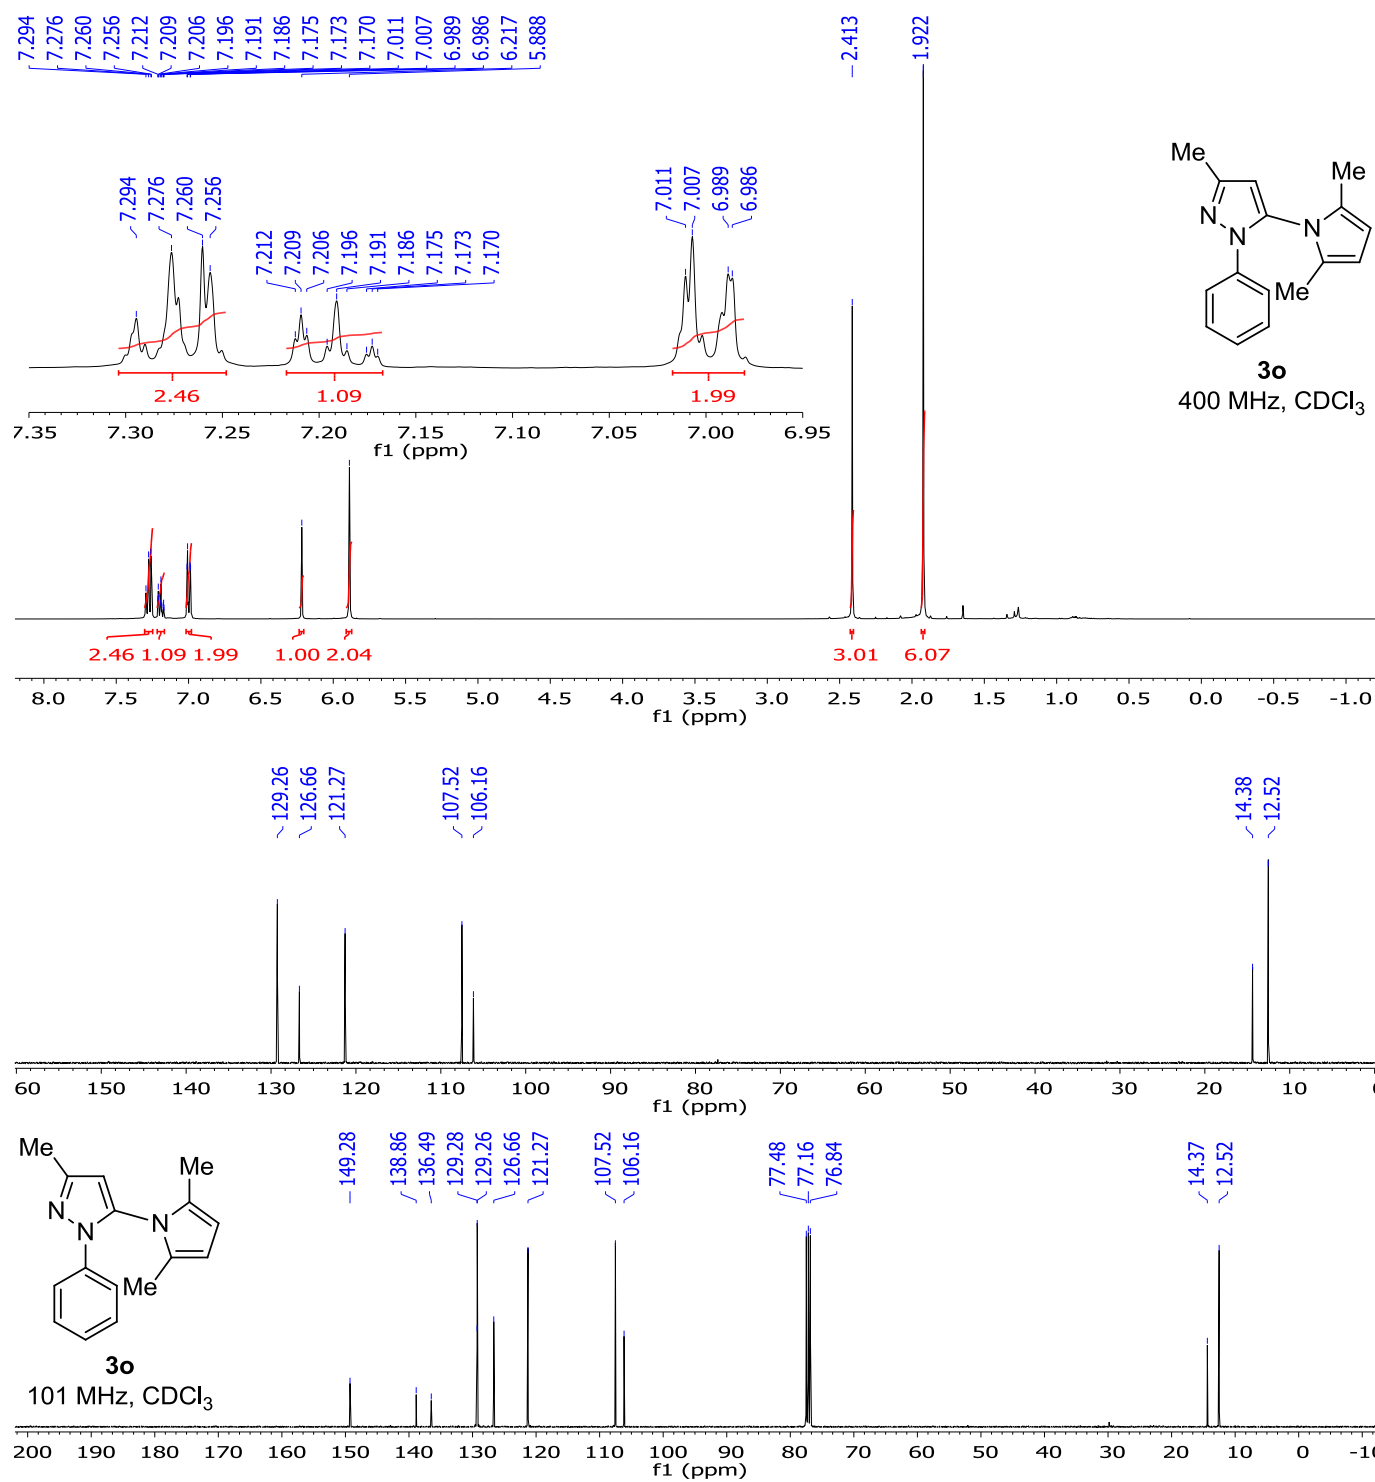

**Figure S13:** <sup>1</sup>H, <sup>13</sup>C{<sup>1</sup>H}, and DEPT-135 spectra for 5-(2,5-dimethyl-1H-pyrrol-1-yl)-3-methyl-1-phenyl-1H-pyrazole **3o**.



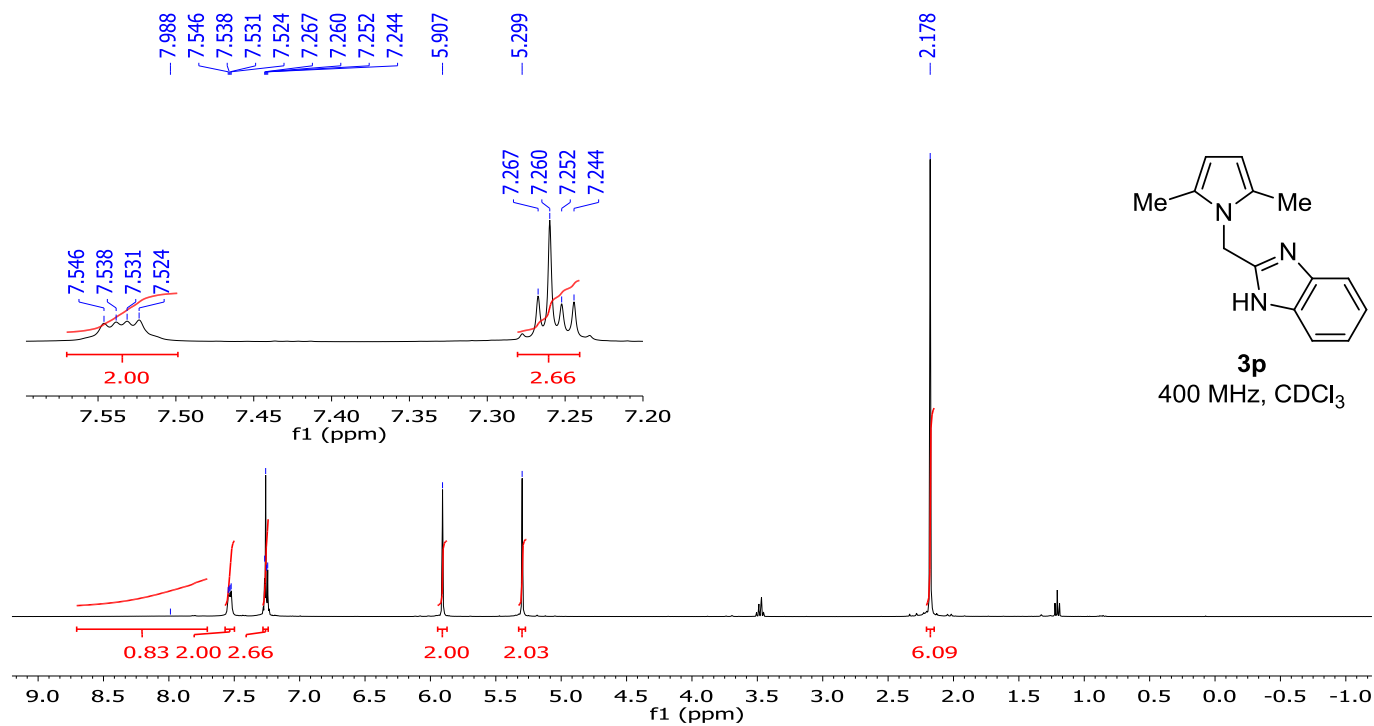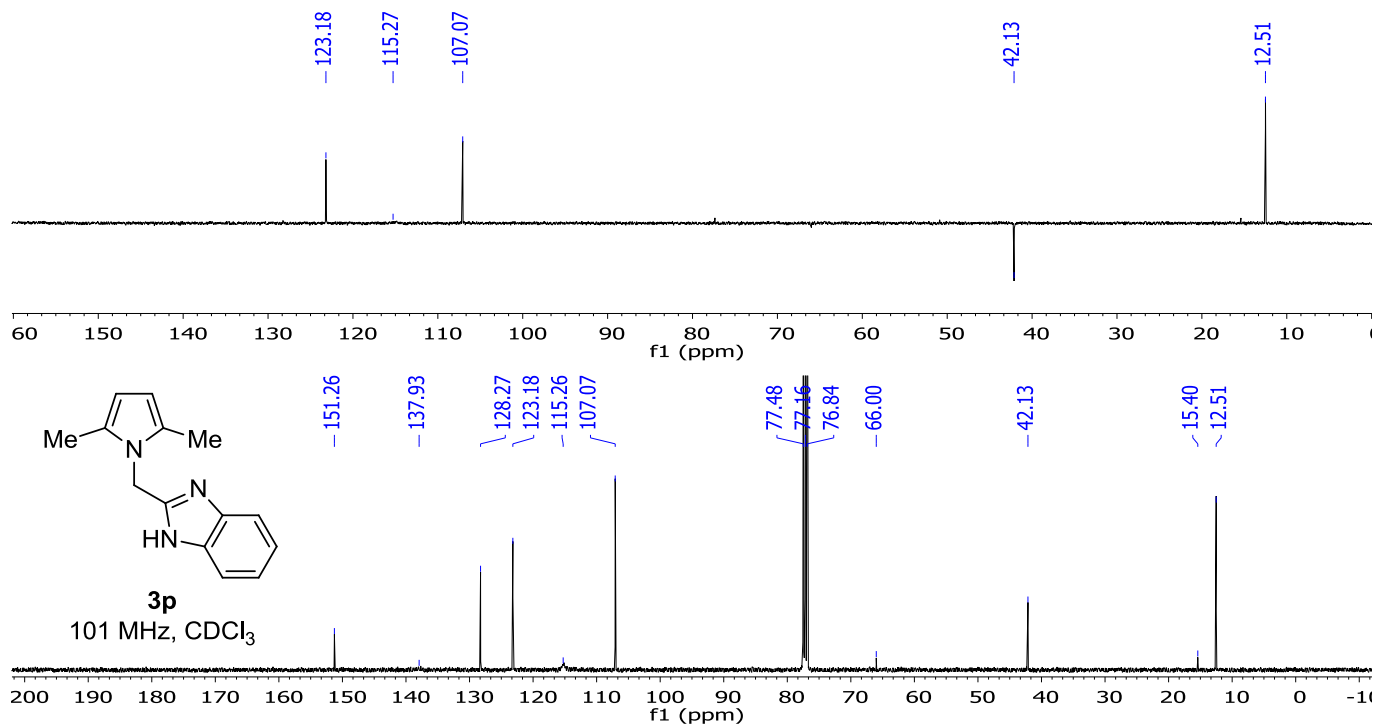

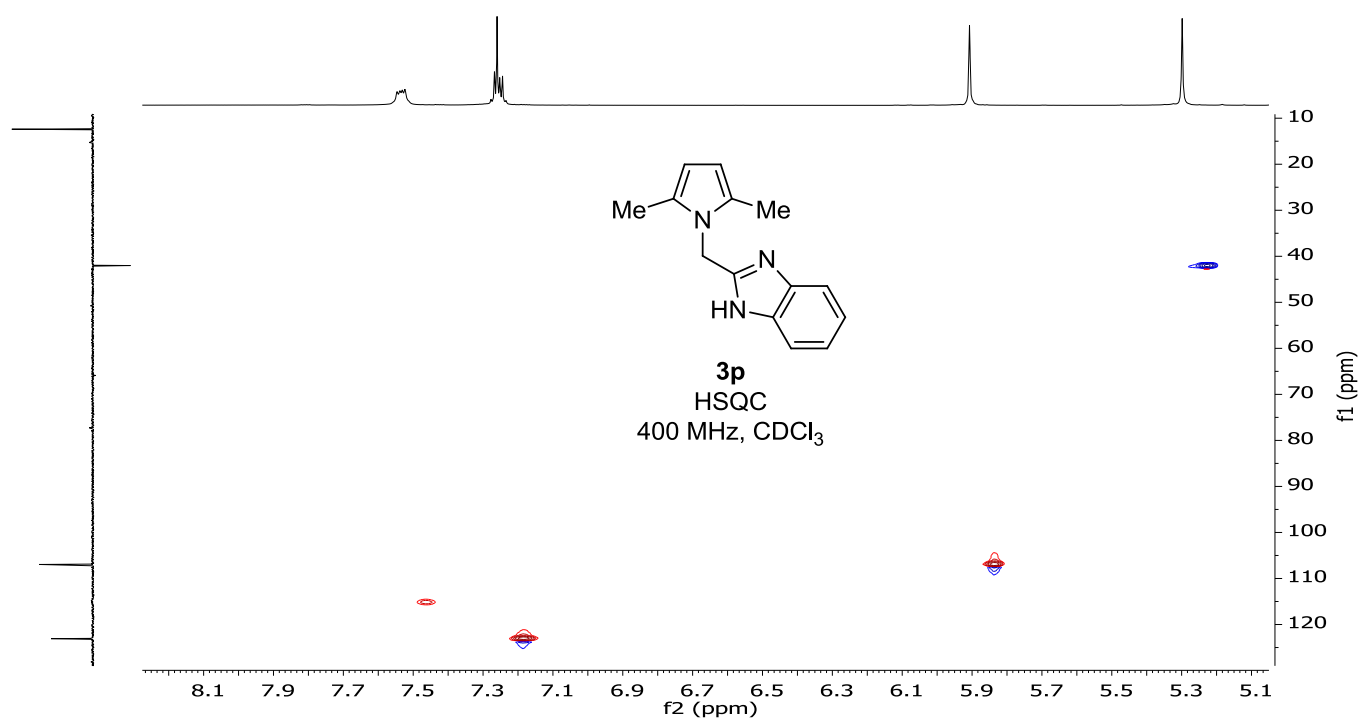

**Figure S14:**  $^1\text{H}$ ,  $^{13}\text{C}\{^1\text{H}\}$ , DEPT-135, and HSQC spectra for 2-((2,5-dimethyl-1H-pyrrol-1-yl)methyl)-1H-benzo[d]imidazole **3p**.

## 2. Copies of HRMS spectra for compounds 3

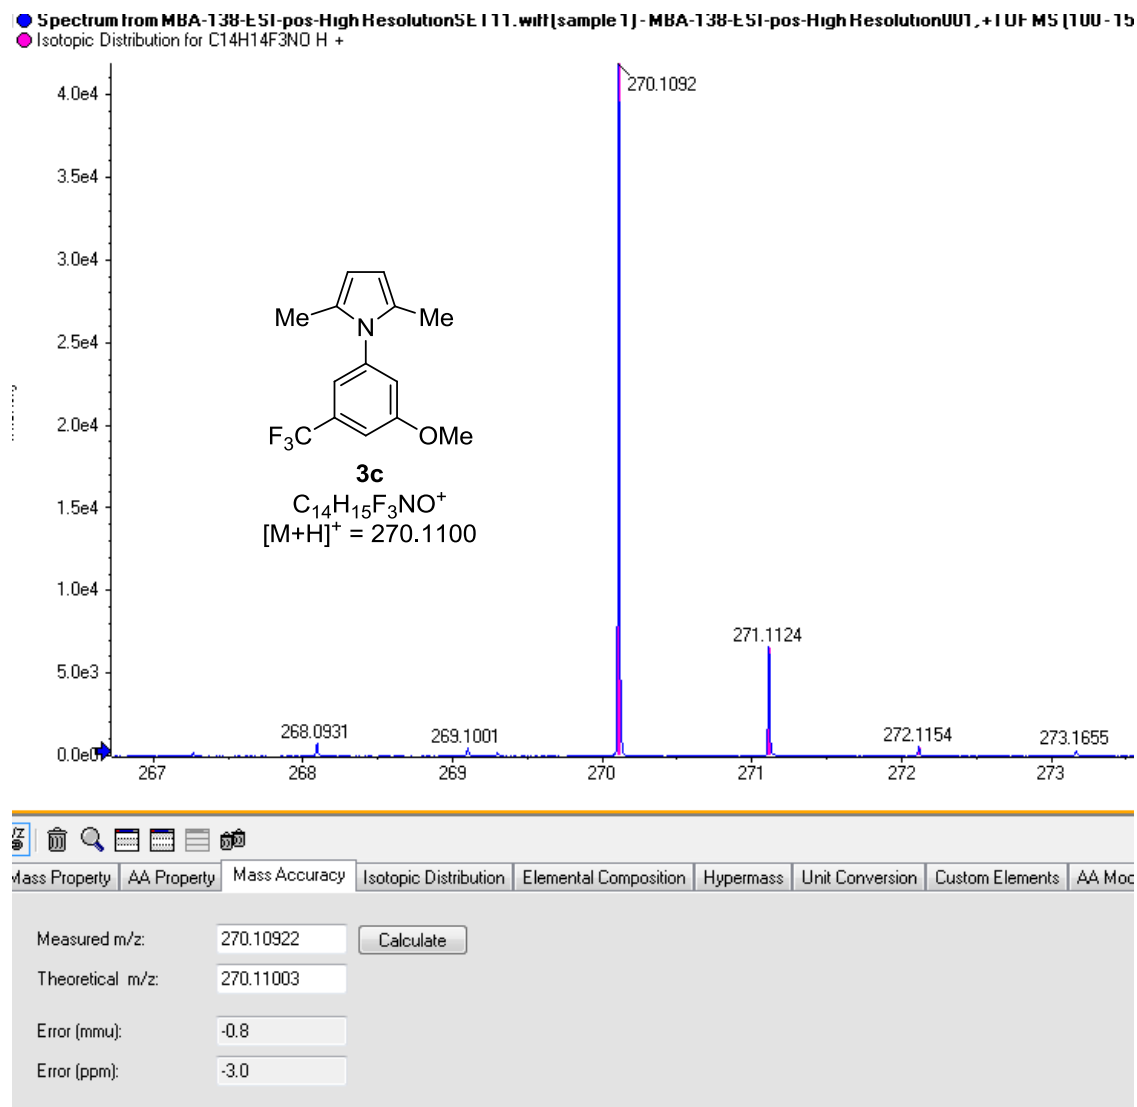

**Figure S15:** HRMS spectrum for 1-(3-methoxy-5-(trifluoromethyl)phenyl)-2,5-dimethyl-1H-pyrrole **3c**.



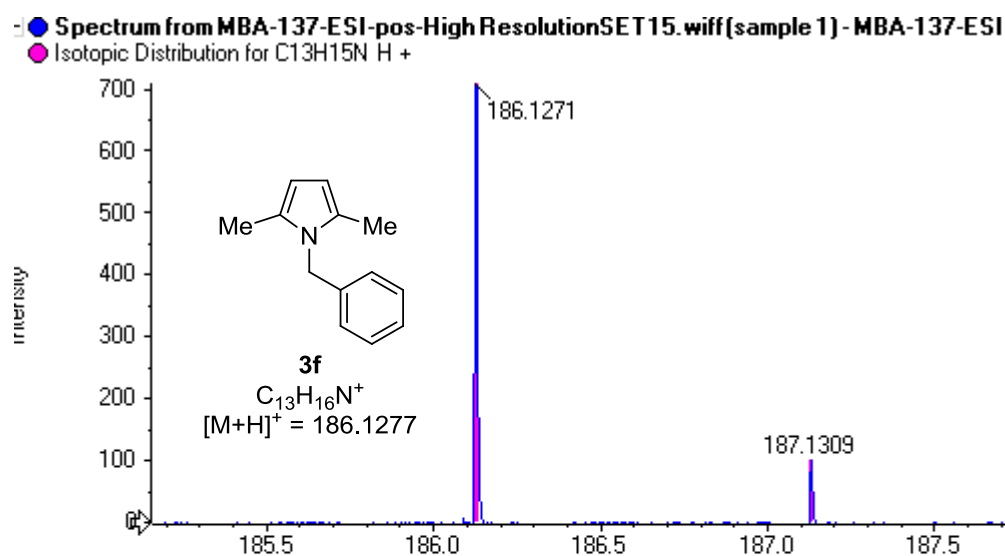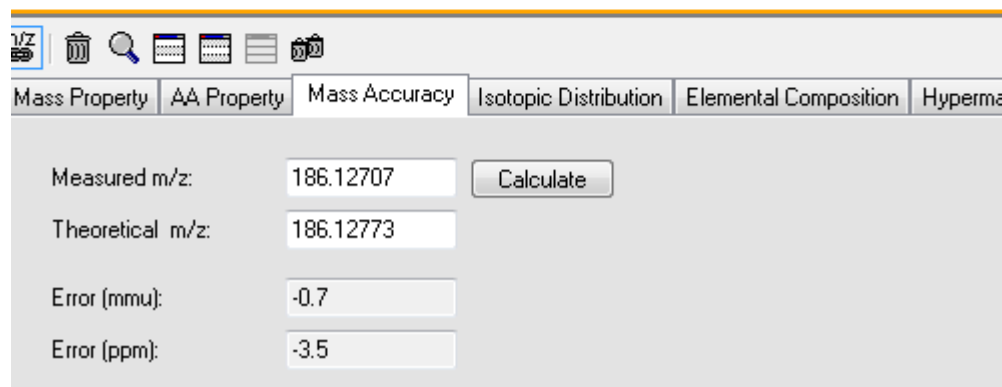

**Figure S17:** HRMS spectrum for 1-benzyl-2,5-dimethyl-1*H*-pyrrole **3f**.

Spectrum from JCC-L05-ESI-pos-High ResolutionSET13.wiff (sample 1) - JCC-L05-ESI-pos-High Resolution003, +TOF MS (100 - 1500) fr

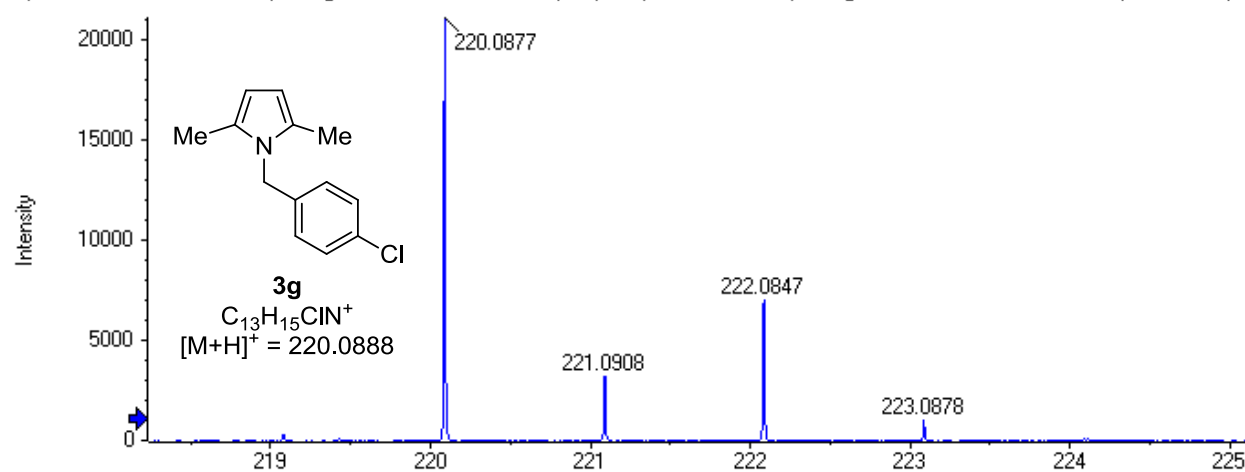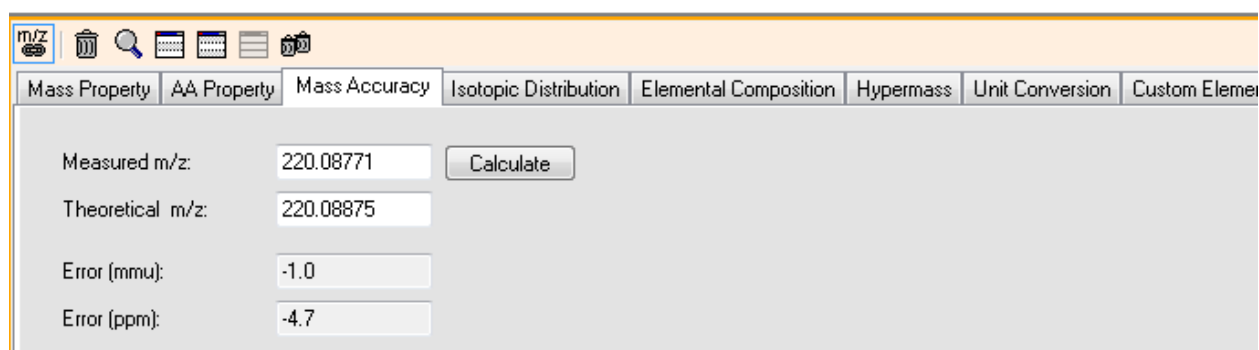

**Figure S18:** HRMS spectrum for 1-(4-chlorobenzyl)-2,5-dimethyl-1*H*-pyrrole **3g**.

Spectrum from JCC-L04-ESI-pos-High ResolutionSET14.wiff (sample 1) - JCC-L04-ESI-pos-High Resolution

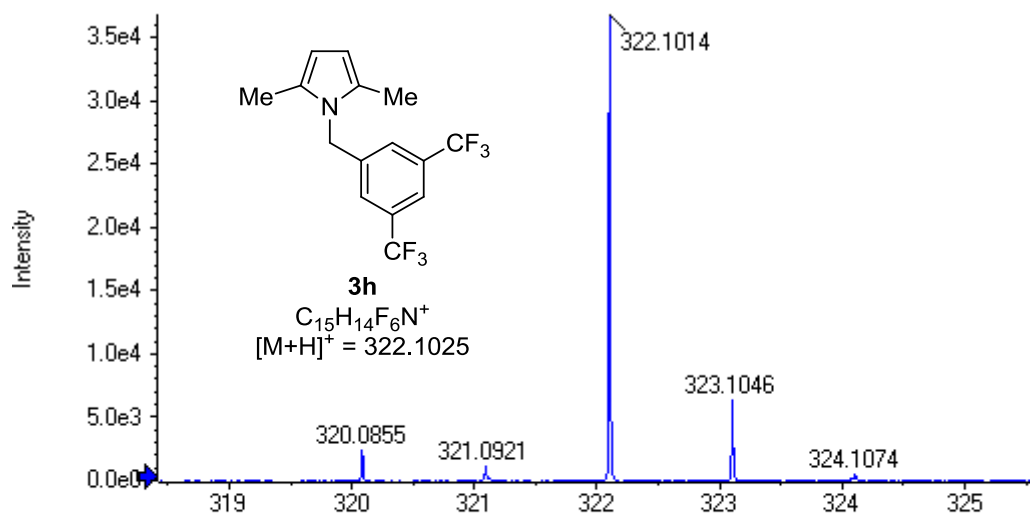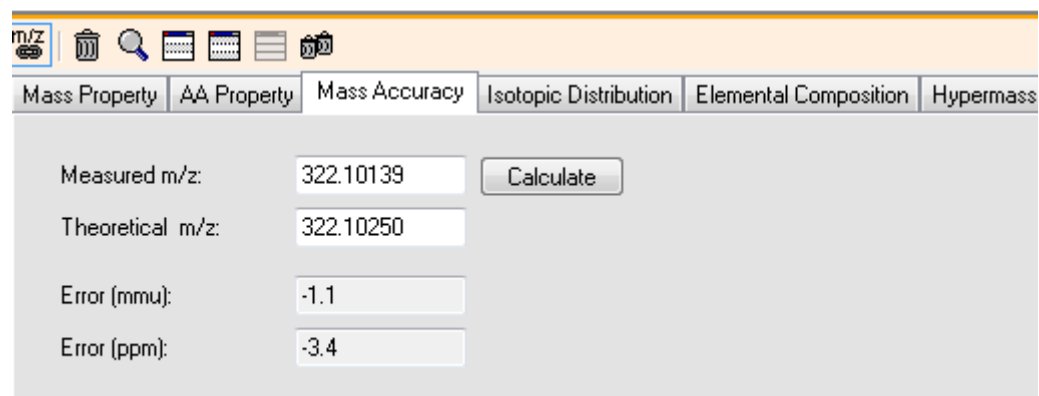

**Figure S19:** HRMS spectrum for 1-(3,5-bis(trifluoromethyl)benzyl)-2,5-dimethyl-1H-pyrrole **3h**.

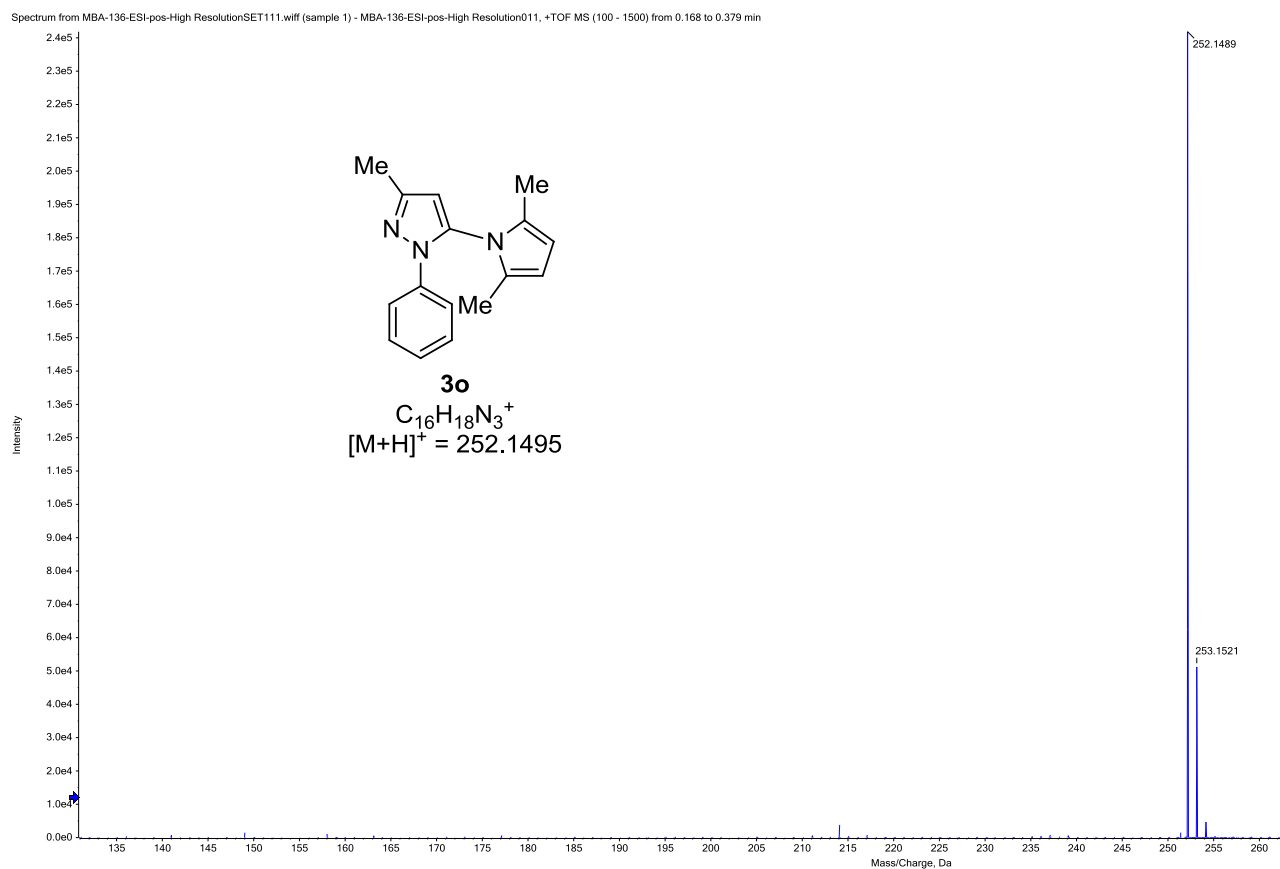

**Figure S20:** HRMS spectrum for 5-(2,5-dimethyl-1*H*-pyrrol-1-yl)-3-methyl-1-phenyl-1*H*-pyrazole **3o**.



spectrum from MBA-132-ESI-pos-High ResolutionSET12.wiff (sample 1) - MBA-132-ESI-pos-High Resolution

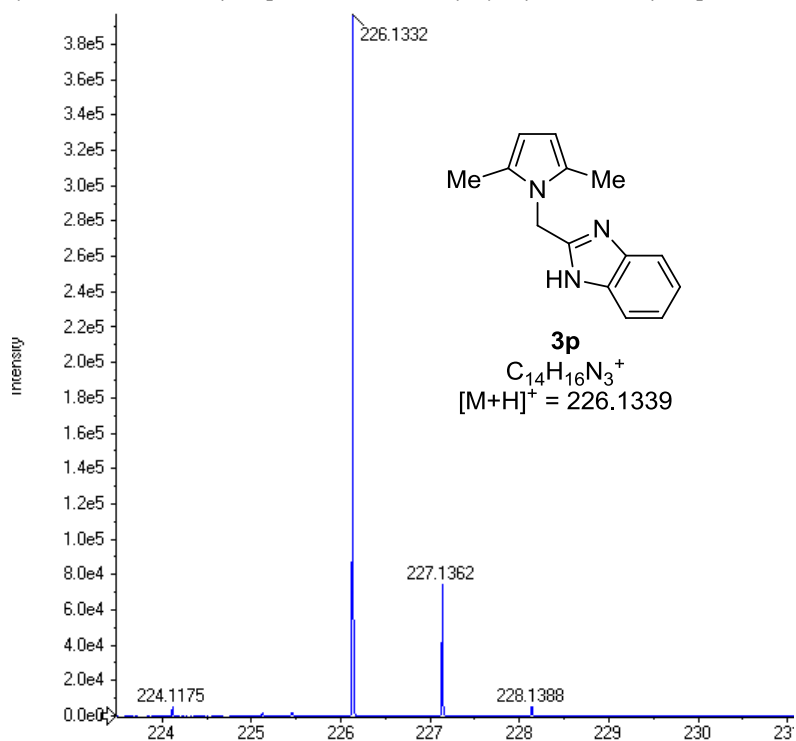

| Mass Property    | AA Property | Mass Accuracy | Isotopic Distribution | Elemental Composition | Hypermass |
|------------------|-------------|---------------|-----------------------|-----------------------|-----------|
| Measured m/z:    | 226.13322   | Calculate     |                       |                       |           |
| Theoretical m/z: | 226.13387   |               |                       |                       |           |
| Error (mmu):     | -0.7        |               |                       |                       |           |
| Error (ppm):     | -2.9        |               |                       |                       |           |

**Figure S21:** HRMS spectrum for 2-((2,5-dimethyl-1H-pyrrol-1-yl)methyl)-1H-benzo[d]imidazole **3p**.

### 3. Crystal data, data collection, and structure refinement details for compound **3g**

**Table S1:** Experimental data for X-ray diffraction analysis for compound **3g**.

| Crystal data                                                              | Compound <b>3g</b>                              |
|---------------------------------------------------------------------------|-------------------------------------------------|
| CCDC <sup>a</sup> code                                                    | 2239500                                         |
| Formula                                                                   | C <sub>13</sub> H <sub>14</sub> ClN             |
| <i>M</i> <sub>r</sub>                                                     | 219.70                                          |
| <i>T</i> [K]                                                              | 200(2)                                          |
| $\lambda$ [Å]                                                             | 0.71073                                         |
| crystal system                                                            | Monoclinic                                      |
| space group                                                               | <i>C</i> 2                                      |
| <i>a</i> [Å]; $\alpha$ [°]                                                | 19.000(1)                                       |
| <i>b</i> [Å]; $\beta$ [°]                                                 | 6.100(1); 135.17(1)                             |
| <i>c</i> [Å]; $\gamma$ [°]                                                | 14.256(1)                                       |
| <i>V</i> [Å <sup>3</sup> ]                                                | 1164.8(1)                                       |
| <i>Z</i>                                                                  | 4                                               |
| $\rho_{\text{calcd}}$ [g cm <sup>-3</sup> ]                               | 1.253                                           |
| $\mu_{\text{MoK}\alpha}$ [mm <sup>-1</sup> ]                              | 0.294                                           |
| <i>F</i> (000)                                                            | 464                                             |
| crystal size [mm <sup>3</sup> ]                                           | 0.56×0.38×0.21                                  |
| $\theta$ range (deg)                                                      | 2.03 to 27.48                                   |
| index ranges                                                              | −24 to 24,<br>−7 to 7,<br>−18 to 18             |
| Reflections collected                                                     | 29796                                           |
| Unique data                                                               | 2676 [ <i>R</i> <sub>int</sub> = 0.039]         |
| obsd data [ <i>I</i> > 2 $\sigma$ ( <i>I</i> )]                           | 2532                                            |
| Goodness-of-fit on <i>F</i> <sup>2</sup>                                  | 1.131                                           |
| final <i>R</i> <sup>a</sup> indices [ <i>I</i> > 2 $\sigma$ ( <i>I</i> )] | <i>R</i> 1 = 0.030,<br><br>w <i>R</i> 2 = 0.089 |
| <i>R</i> <sup>b</sup> indices (all data)                                  | <i>R</i> 1 = 0.035,<br>w <i>R</i> 2 = 0.101     |
| largest diff. peak/hole [e Å <sup>-3</sup> ]                              | 0.246/−0.245                                    |

<sup>a</sup> Cambridge Crystallographic Data Centre. <sup>b</sup>*R*1 =  $\Sigma||F_o| - |F_c|| / [\Sigma|F_o|]$ , w*R*2 =  $\{[\Sigma w(F_o^2 - F_c^2)^2] / [\Sigma w(F_o^2)^2]\}^{1/2}$

#### 4. X-Ray powder diffraction data for compound **3g**

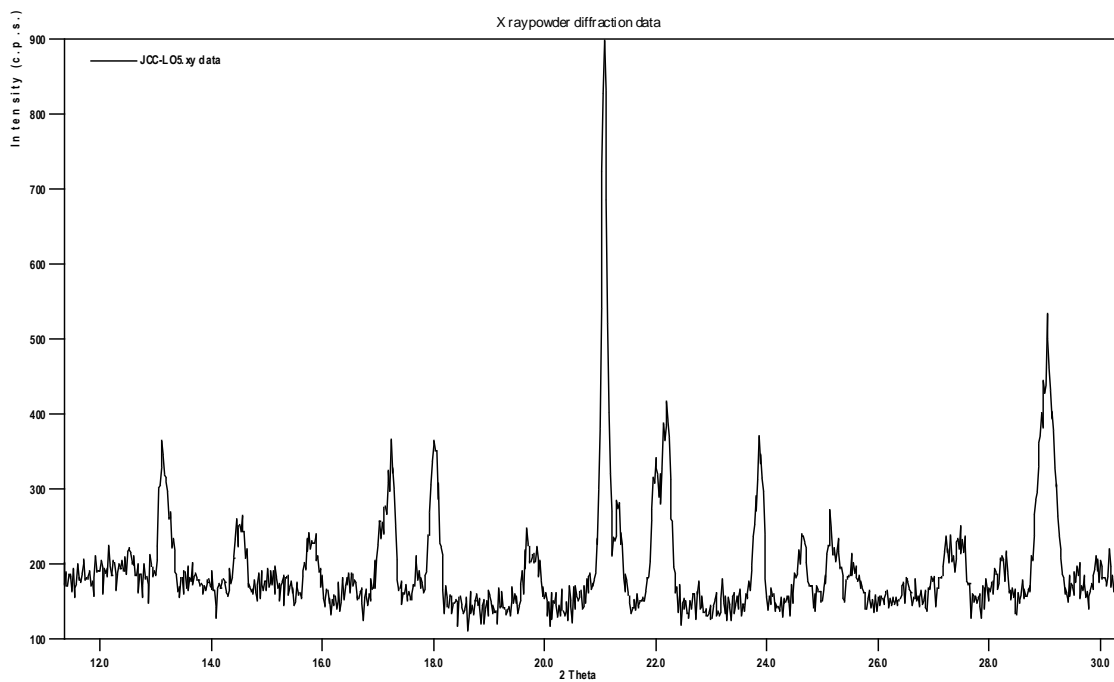

**Figure S22:** X-Ray powder diffraction data for compound **3g**.

## 5. Surface area, pore volume, and pore size of aluminas

**Table S2:** Surface area, pore volume, and pore size of CATAPAL 200.

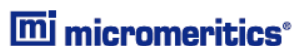

ASAP 2020 V3.00 H

Unit 1

Serial #: 181

Page 1

Sample: 4PORTI  
Operator: Ing. Edgardo Soto/Lic. Fetsis  
Submitter: Omar Portilla  
File: C:\2020\DATA\4PORTI.SMP

Started: 25/10/2016 5:28:46p.m.  
Completed: 26/10/2016 3:46:51a.m.  
Report Time: 26/10/2016 3:46:52a.m.  
Sample Mass: 0.1926 g  
Cold Free Space: 47.6600 cm<sup>3</sup>  
Low Pressure Dose: None

Analysis Adsorptive: N<sub>2</sub>  
Analysis Bath Temp.: -195.800 °C  
Thermal Correction: No  
Warm Free Space: 16.1098 cm<sup>3</sup> Measured  
Equilibration Interval: 10 s  
Automatic Degas: Yes

### Summary Report

#### Surface Area

Single point surface area at P/Po = 0.200241514: 46.1978 m<sup>2</sup>/g

BET Surface Area: 46.9425 m<sup>2</sup>/g

Langmuir Surface Area: 536.3472 m<sup>2</sup>/g

t-Plot Micropore Area: 7.2455 m<sup>2</sup>/g

t-Plot External Surface Area: 39.6970 m<sup>2</sup>/g

BJH Adsorption cumulative surface area of pores  
between 17.000 Å and 3000.000 Å width: 50.243 m<sup>2</sup>/g

BJH Desorption cumulative surface area of pores  
between 17.000 Å and 3000.000 Å width: 87.3445 m<sup>2</sup>/g

#### Pore Volume

Single point adsorption total pore volume of pores  
less than 1339.820 Å width at P/Po = 0.985474056: 0.443699 cm<sup>3</sup>/g

t-Plot micropore volume: 0.003199 cm<sup>3</sup>/g

BJH Adsorption cumulative volume of pores  
between 17.000 Å and 3000.000 Å width: 0.463089 cm<sup>3</sup>/g

BJH Desorption cumulative volume of pores  
between 17.000 Å and 3000.000 Å width: 0.465721 cm<sup>3</sup>/g

#### Pore Size

Adsorption average pore width (4V/A by BET): 378.0782 Å

BJH Adsorption average pore width (4V/A): 368.682 Å

BJH Desorption average pore width (4V/A): 213.280 Å

#### Freundlich

Qm-C: 1.1841 ± 0.1882 cm<sup>3</sup>/g STP

m: 1.7332 ± 0.1970

#### Temkin

q-alpha/Qm: 0.027726 ± 0.007606 kJ/mol·(cm<sup>3</sup>/g STP)

A: 0.0324 ± 0.0582 mmHg

### BET Surface Area Report

BET Surface Area:  $46.9425 \pm 0.0634 \text{ m}^2/\text{g}$

Slope:  $0.092341 \pm 0.000125 \text{ g}/\text{cm}^3 \text{ STP}$

Y-Intercept:  $0.000393 \pm 0.000013 \text{ g}/\text{cm}^3 \text{ STP}$

C: 235.769893

Qm:  $10.7835 \text{ cm}^3/\text{g STP}$

Correlation Coefficient: 0.9999873

Molecular Cross-Sectional Area:  $0.1620 \text{ nm}^2$

| Relative Pressure<br>(P/Po) | Quantity Adsorbed<br>(cm <sup>3</sup> /g STP) | 1/[Q(Po/P - 1)] |
|-----------------------------|-----------------------------------------------|-----------------|
| 0.009774073                 | 7.9929                                        | 0.001235        |
| 0.015758448                 | 8.8682                                        | 0.001805        |
| 0.022187218                 | 9.3707                                        | 0.002421        |
| 0.029681599                 | 9.7638                                        | 0.003133        |
| 0.040172001                 | 10.1587                                       | 0.004120        |
| 0.050069385                 | 10.4464                                       | 0.005046        |
| 0.055158248                 | 10.5732                                       | 0.005521        |
| 0.060349078                 | 10.7077                                       | 0.005998        |
| 0.070326726                 | 10.9371                                       | 0.006917        |
| 0.080405117                 | 11.1517                                       | 0.007841        |
| 0.100240473                 | 11.5223                                       | 0.009669        |
| 0.120317474                 | 11.8900                                       | 0.011503        |
| 0.140358624                 | 12.2334                                       | 0.013347        |
| 0.160404302                 | 12.5795                                       | 0.015187        |
| 0.180344468                 | 12.9197                                       | 0.017030        |
| 0.200241514                 | 13.2695                                       | 0.018869        |

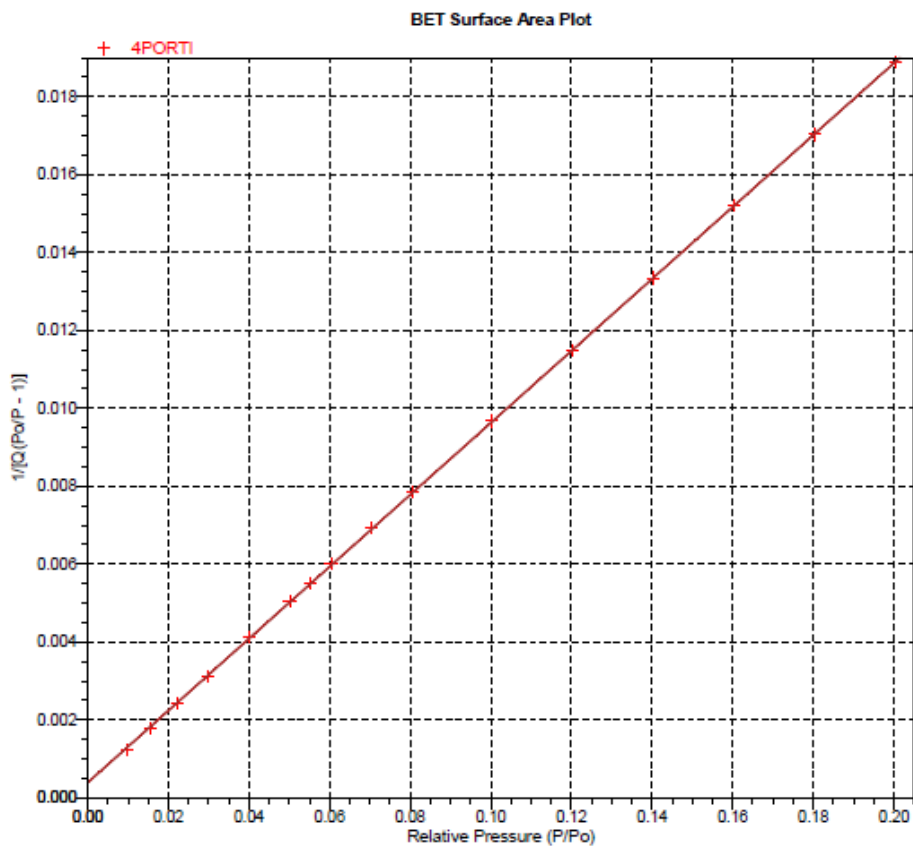

**Table S3:** Surface area, pore volume, and pore size of CATAPAL C-1.

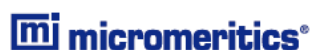

ASAP 2020 V3.00 H

Unit 1

Serial #: 181

Page 1

Sample: 2PORTI  
Operator: Ing. Edgardo Soto/Lic. Fetsis  
Submitter: Omar Portilla  
File: C:\2020\DATA\2PORTI.SMP

|                                          |                                                   |
|------------------------------------------|---------------------------------------------------|
| Started: 21/10/2016 9:37:19a.m.          | Analysis Adsorptive: N2                           |
| Completed: 21/10/2016 5:06:48p.m.        | Analysis Bath Temp.: -195.800 °C                  |
| Report Time: 21/10/2016 5:06:51p.m.      | Thermal Correction: No                            |
| Sample Mass: 0.1568 g                    | Warm Free Space: 16.3928 cm <sup>3</sup> Measured |
| Cold Free Space: 48.3692 cm <sup>3</sup> | Equilibration Interval: 10 s                      |
| Low Pressure Dose: None                  | Automatic Degas: Yes                              |

### Summary Report

#### Surface Area

Single point surface area at P/Po = 0.200525222: 234.9990 m<sup>2</sup>/g

BET Surface Area: 239.0706 m<sup>2</sup>/g

Langmuir Surface Area: 1416.8247 m<sup>2</sup>/g

t-Plot Micropore Area: 33.3750 m<sup>2</sup>/g

t-Plot External Surface Area: 205.6956 m<sup>2</sup>/g

BJH Adsorption cumulative surface area of pores  
between 17.000 Å and 3000.000 Å width: 227.509 m<sup>2</sup>/g

BJH Desorption cumulative surface area of pores  
between 17.000 Å and 3000.000 Å width: 277.4043 m<sup>2</sup>/g

#### Pore Volume

Single point adsorption total pore volume of pores  
less than 1860.680 Å width at P/Po = 0.989596767: 0.374051 cm<sup>3</sup>/g

t-Plot micropore volume: 0.014613 cm<sup>3</sup>/g

BJH Adsorption cumulative volume of pores  
between 17.000 Å and 3000.000 Å width: 0.356414 cm<sup>3</sup>/g

BJH Desorption cumulative volume of pores  
between 17.000 Å and 3000.000 Å width: 0.381550 cm<sup>3</sup>/g

#### Pore Size

Adsorption average pore width (4V/A by BET): 62.5842 Å

BJH Adsorption average pore width (4V/A): 62.664 Å

BJH Desorption average pore width (4V/A): 55.017 Å

#### Freundlich

Qm-C: 9.9220 ± 0.6958 cm<sup>3</sup>/g STP

m: 2.2265 ± 0.1432

#### Temkin

q-alpha/Qm: 0.012587 ± 0.001192 kJ/mol·(cm<sup>3</sup>/g STP)

A: 0.0652 ± 0.0384 mmHg

### BET Surface Area Report

BET Surface Area:  $239.0706 \pm 0.4532 \text{ m}^2/\text{g}$

Slope:  $0.018124 \pm 0.000034 \text{ g/cm}^3 \text{ ST}$

Y-Intercept:  $0.000085 \pm 0.000004 \text{ g/cm}^3 \text{ ST}$

C: 214.979066

Qm:  $54.9184 \text{ cm}^3/\text{g STP}$

Correlation Coefficient: 0.9999749

Molecular Cross-Sectional Area:  $0.1620 \text{ nm}^2$

| Relative Pressure<br>(P/Po) | Quantity Adsorbed<br>(cm <sup>3</sup> /g STP) | 1/[Q(Po/P - 1)] |
|-----------------------------|-----------------------------------------------|-----------------|
| 0.009685705                 | 40.1011                                       | 0.000244        |
| 0.014719229                 | 44.0100                                       | 0.000339        |
| 0.019621575                 | 46.2323                                       | 0.000433        |
| 0.032905282                 | 49.8231                                       | 0.000683        |
| 0.043144985                 | 51.6938                                       | 0.000872        |
| 0.049427555                 | 52.6496                                       | 0.000988        |
| 0.055154497                 | 53.4529                                       | 0.001092        |
| 0.059759451                 | 54.0397                                       | 0.001176        |
| 0.070231696                 | 55.3012                                       | 0.001366        |
| 0.080256312                 | 56.4072                                       | 0.001547        |
| 0.100093476                 | 58.4295                                       | 0.001904        |
| 0.120277457                 | 60.3433                                       | 0.002266        |
| 0.140270583                 | 62.1646                                       | 0.002625        |
| 0.160312254                 | 63.9505                                       | 0.002985        |
| 0.180435288                 | 65.7216                                       | 0.003350        |
| 0.200525222                 | 67.5232                                       | 0.003715        |

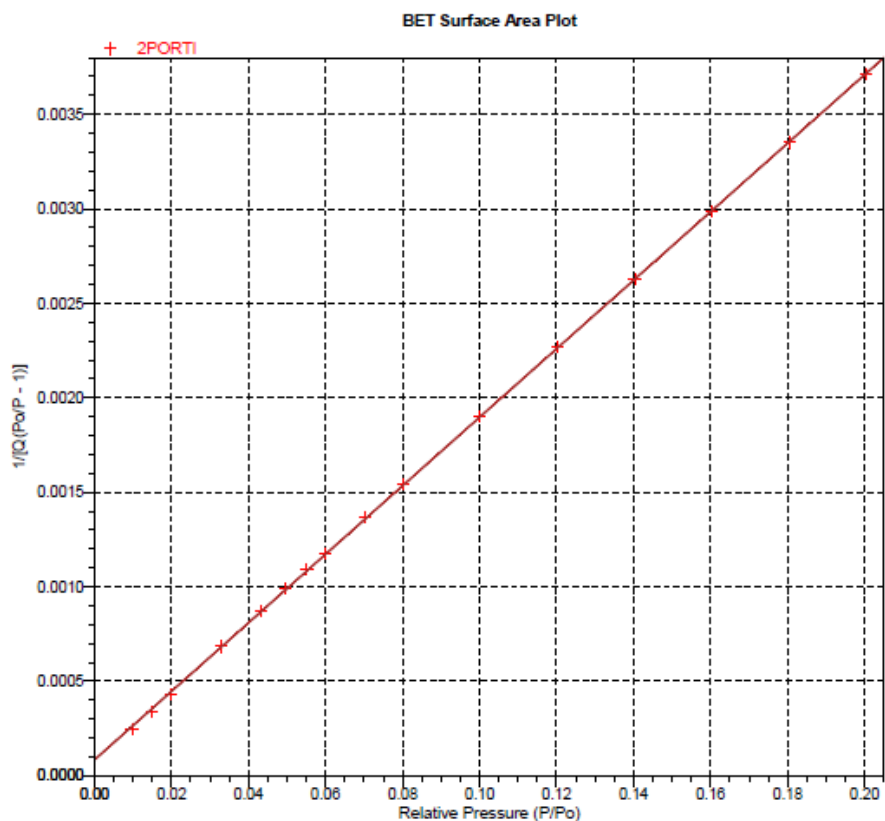

**Table S4:** Surface area, pore volume, and pore size of CATALOX SBA-90.

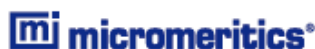

ASAP 2020 V3.00 H

Unit 1

Serial #: 181

Page 1

Sample: 1PORTI  
Operator: Ing. Edgardo Soto/Lic. Fetsis  
Submitter: Omar Portilla  
File: C:\2020\DATA\1PORTI.SMP

|                                          |                                                   |
|------------------------------------------|---------------------------------------------------|
| Started: 24/10/2016 9:49:52a.m.          | Analysis Adsorptive: N2                           |
| Completed: 24/10/2016 6:32:14p.m.        | Analysis Bath Temp.: -195.800 °C                  |
| Report Time: 24/10/2016 6:31:09p.m.      | Thermal Correction: No                            |
| Sample Mass: 0.1855 g                    | Warm Free Space: 16.4755 cm <sup>3</sup> Measured |
| Cold Free Space: 48.9476 cm <sup>3</sup> | Equilibration Interval: 10 s                      |
| Low Pressure Dose: None                  | Automatic Degas: Yes                              |

#### Summary Report

##### Surface Area

Single point surface area at P/Po = 0.200200904: 104.2507 m<sup>2</sup>/g

BET Surface Area: 106.6336 m<sup>2</sup>/g

Langmuir Surface Area: 1556.2280 m<sup>2</sup>/g

t-Plot Micropore Area: 10.8103 m<sup>2</sup>/g

t-Plot External Surface Area: 95.8234 m<sup>2</sup>/g

BJH Adsorption cumulative surface area of pores  
between 17.000 Å and 3000.000 Å width: 101.186 m<sup>2</sup>/g

BJH Desorption cumulative surface area of pores  
between 17.000 Å and 3000.000 Å width: 134.4968 m<sup>2</sup>/g

##### Pore Volume

Single point adsorption total pore volume of pores  
less than 1616.757 Å width at P/Po = 0.988001590: 0.389821 cm<sup>3</sup>/g

t-Plot micropore volume: 0.004434 cm<sup>3</sup>/g

BJH Adsorption cumulative volume of pores  
between 17.000 Å and 3000.000 Å width: 0.384812 cm<sup>3</sup>/g

BJH Desorption cumulative volume of pores  
between 17.000 Å and 3000.000 Å width: 0.392077 cm<sup>3</sup>/g

##### Pore Size

Adsorption average pore width (4V/A by BET): 146.2283 Å

BJH Adsorption average pore width (4V/A): 152.120 Å

BJH Desorption average pore width (4V/A): 116.606 Å

##### Freundlich

Qm-C: 2.4121 ± 0.3463 cm<sup>3</sup>/g STP

m: 1.6779 ± 0.1668

##### Temkin

q-alpha/Qm: 0.014000 ± 0.002266 kJ/mol-(cm<sup>3</sup>/g STP)

A: 0.0350 ± 0.0369 mmHg



# BET Surface Area Report

BET Surface Area:  $106.6336 \pm 0.4010 \text{ m}^2/\text{g}$

Slope:  $0.040569 \pm 0.000153 \text{ g/cm}^3 \text{ STP}$

Y-Intercept:  $0.000255 \pm 0.000016 \text{ g/cm}^3 \text{ STP}$

C: 159.889310

Qm:  $24.4955 \text{ cm}^3/\text{g STP}$

Correlation Coefficient: 0.9999008

Molecular Cross-Sectional Area:  $0.1620 \text{ nm}^2$

| Relative Pressure (P/Po) | Quantity Adsorbed (cm <sup>3</sup> /g STP) | 1/[Q(Po/P - 1)] |
|--------------------------|--------------------------------------------|-----------------|
| 0.010001076              | 17.4902                                    | 0.000578        |
| 0.015103394              | 18.7257                                    | 0.000819        |
| 0.021234551              | 19.7979                                    | 0.001096        |
| 0.030056956              | 20.9216                                    | 0.001481        |
| 0.039918060              | 21.8993                                    | 0.001899        |
| 0.050146727              | 22.7156                                    | 0.002324        |
| 0.054816488              | 23.0719                                    | 0.002514        |
| 0.060181446              | 23.4507                                    | 0.002731        |
| 0.070200667              | 24.0455                                    | 0.003140        |
| 0.080241782              | 24.6371                                    | 0.003541        |
| 0.099949319              | 25.6458                                    | 0.004330        |
| 0.119988042              | 26.5994                                    | 0.005126        |
| 0.140167470              | 27.4759                                    | 0.005933        |
| 0.160008250              | 28.3171                                    | 0.006727        |
| 0.180179458              | 29.1444                                    | 0.007541        |
| 0.200200904              | 29.9426                                    | 0.008360        |

BET Surface Area Plot

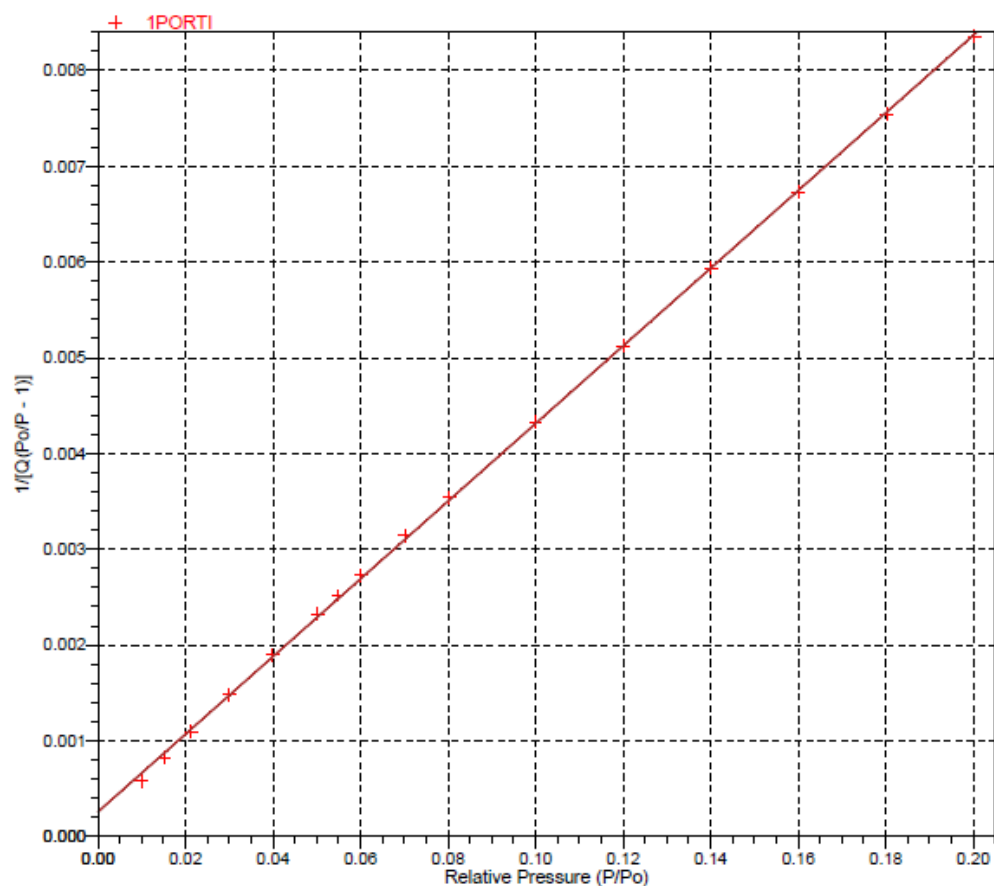

**Table S5:** Surface area, pore volume, and pore size of CATALOX SBA-200.

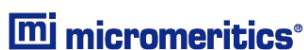

ASAP 2020 V3.00 H

Unit 1

Serial #: 181

Page 1

Sample: 3PORTI  
Operator: Ing. Edgardo Soto/Lic. Fetsis  
Submitter: Omar Portilla  
File: C:\2020\DATA\3PORTI.SMP

|                                          |                                                   |
|------------------------------------------|---------------------------------------------------|
| Started: 25/10/2016 8:40:08a.m.          | Analysis Adsorptive: N2                           |
| Completed: 25/10/2016 5:19:01p.m.        | Analysis Bath Temp.: -195.800 °C                  |
| Report Time: 25/10/2016 5:19:04p.m.      | Thermal Correction: No                            |
| Sample Mass: 0.1845 g                    | Warm Free Space: 16.5324 cm <sup>3</sup> Measured |
| Cold Free Space: 49.5223 cm <sup>3</sup> | Equilibration Interval: 10 s                      |
| Low Pressure Dose: None                  | Automatic Degas: Yes                              |

#### Summary Report

##### Surface Area

Single point surface area at P/Po = 0.200199284: 194.9608 m<sup>2</sup>/g

BET Surface Area: 199.2839 m<sup>2</sup>/g

Langmuir Surface Area: 1977.1800 m<sup>2</sup>/g

t-Plot Micropore Area: 5.1076 m<sup>2</sup>/g

t-Plot External Surface Area: 194.1763 m<sup>2</sup>/g

BJH Adsorption cumulative surface area of pores  
between 17.000 Å and 3000.000 Å width: 220.924 m<sup>2</sup>/g

BJH Desorption cumulative surface area of pores  
between 17.000 Å and 3000.000 Å width: 264.5917 m<sup>2</sup>/g

##### Pore Volume

Single point adsorption total pore volume of pores  
less than 1856.500 Å width at P/Po = 0.989573005: 0.417257 cm<sup>3</sup>/g

t-Plot micropore volume: 0.001792 cm<sup>3</sup>/g

BJH Adsorption cumulative volume of pores  
between 17.000 Å and 3000.000 Å width: 0.412826 cm<sup>3</sup>/g

BJH Desorption cumulative volume of pores  
between 17.000 Å and 3000.000 Å width: 0.421420 cm<sup>3</sup>/g

##### Pore Size

Adsorption average pore width (4V/A by BET): 83.7513 Å

BJH Adsorption average pore width (4V/A): 74.745 Å

BJH Desorption average pore width (4V/A): 63.709 Å

##### Freundlich

Qm-C: 5.5407 ± 0.5153 cm<sup>3</sup>/g STP

m: 1.8375 ± 0.1296

##### Temkin

q-alpha/Qm: 0.010634 ± 0.001132 kJ/mol·(cm<sup>3</sup>/g STP)

A: 0.0458 ± 0.0311 mmHg

### BET Surface Area Report

BET Surface Area:  $199.2839 \pm 1.0643 \text{ m}^2/\text{g}$   
 Slope:  $0.021688 \pm 0.000116 \text{ g}/\text{cm}^3 \text{ STP}$   
 Y-Intercept:  $0.000156 \pm 0.000012 \text{ g}/\text{cm}^3 \text{ STP}$   
 C: 139.889767  
 Qm:  $45.7787 \text{ cm}^3/\text{g STP}$   
 Correlation Coefficient: 0.9997996  
 Molecular Cross-Sectional Area:  $0.1620 \text{ nm}^2$

| Relative Pressure (P/Po) | Quantity Adsorbed (cm <sup>3</sup> /g STP) | 1/[Q(Po/P - 1)] |
|--------------------------|--------------------------------------------|-----------------|
| 0.009760075              | 31.9705                                    | 0.000308        |
| 0.015750683              | 34.5900                                    | 0.000463        |
| 0.020465298              | 36.0562                                    | 0.000579        |
| 0.029480266              | 38.2287                                    | 0.000795        |
| 0.040097118              | 40.1986                                    | 0.001039        |
| 0.049958053              | 41.6878                                    | 0.001261        |
| 0.054740960              | 42.3514                                    | 0.001367        |
| 0.059538748              | 42.9717                                    | 0.001473        |
| 0.069862587              | 44.2213                                    | 0.001699        |
| 0.080155705              | 45.3424                                    | 0.001922        |
| 0.100046957              | 47.3666                                    | 0.002347        |
| 0.119988995              | 49.2180                                    | 0.002771        |
| 0.140090729              | 50.9875                                    | 0.003195        |
| 0.160037764              | 52.6723                                    | 0.003617        |
| 0.180183680              | 54.3369                                    | 0.004045        |
| 0.200199284              | 55.9960                                    | 0.004470        |

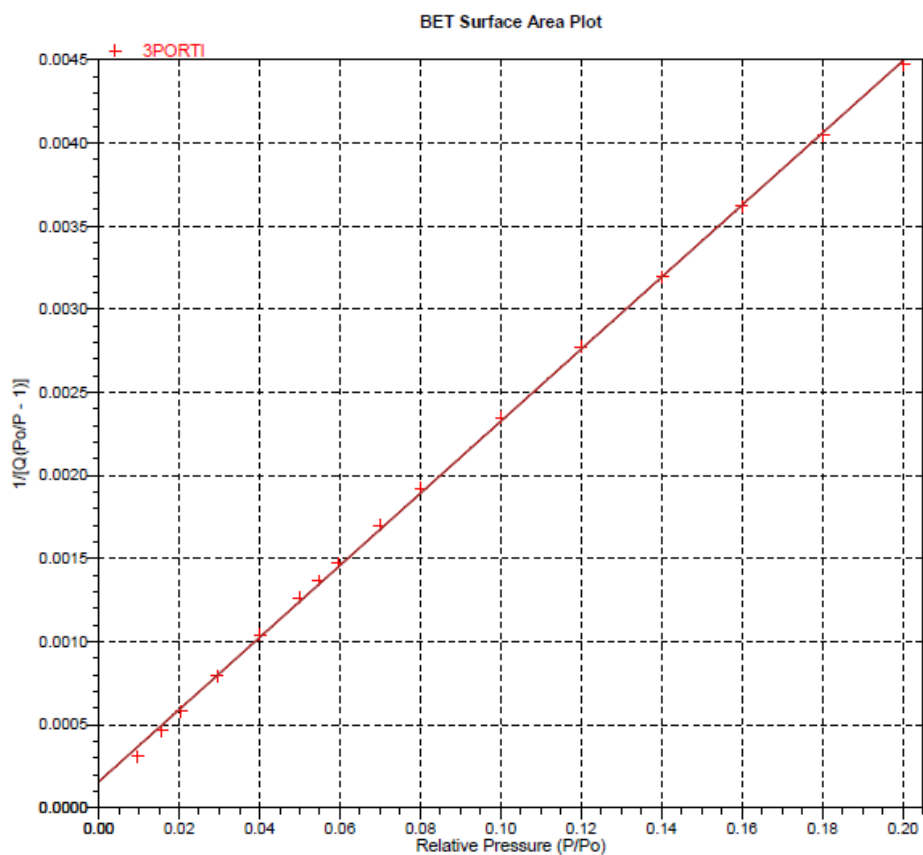

## 6. References

- [1] Walia, A.; Kang, S.; Silverman, R. B. Microwave-assisted protection of primary amines as 2,5-dimethylpyrroles and their orthogonal deprotection. *J. Org. Chem.* **2013**, 78, 10931–10937, doi: 10.1021/jo401778e.
- [2] Aghapoor, K.; Ebadi-Nia, L.; Mohsenzadeh, F.; Mohebi Morad, M.; Balavar, Y.; Reza Darabi, H. Silica-supported bismuth(III) chloride as a new recyclable heterogeneous catalyst for the Paal–Knorr pyrrole synthesis. *J. Organomet. Chem.* **2012**, 708–709, 25–30, doi: 10.1016/j.jorganchem.2012.02.008.
- [3] Chen, X.; Yang, M.; Zhou, M. Efficient synthesis of substituted pyrroles through Pd(OCOCF<sub>3</sub>)<sub>2</sub>-catalyzed reaction of 5-hexen-2-one with primary amines. *Tetrahedron Lett.* **2016**, 57, 5215–5218, doi: 10.1016/j.tetlet.2016.10.029.
- [4] Fu, W.; Zhu, L.; Tan, S.; Zhao, Z.; Yu, X.; Wang, L. Copper/nitroxyl-catalyzed synthesis of pyrroles by oxidative coupling of diols and primary amines at room temperature. *J. Org. Chem.* **2022**, 87, 13389–13395, doi: 10.1021/acs.joc.2c01646.
- [5] Portilla-Zúñiga, O.; Sathicq, Á.; Martínez, J.; Rojas, H.; De Geronimo, E.; Luque, R.; Romanelli, G. P. Novel bifunctional mesoporous catalysts based on Preyssler heteropolyacids for green pyrrole derivative synthesis. *Catalysts* **2018**, 8, 419, doi: 10.3390/catal8100419.
